# Supplementary material for: DNA Methylation Age Drift Is Associated with Poor Outcomes and De-Differentiation in Papillary and Follicular Thyroid Carcinomas
Source: MDPI journal article supplement (doi:10.3390/cancers13194827), 2021-09-27
Supplement: s1 [file s1]

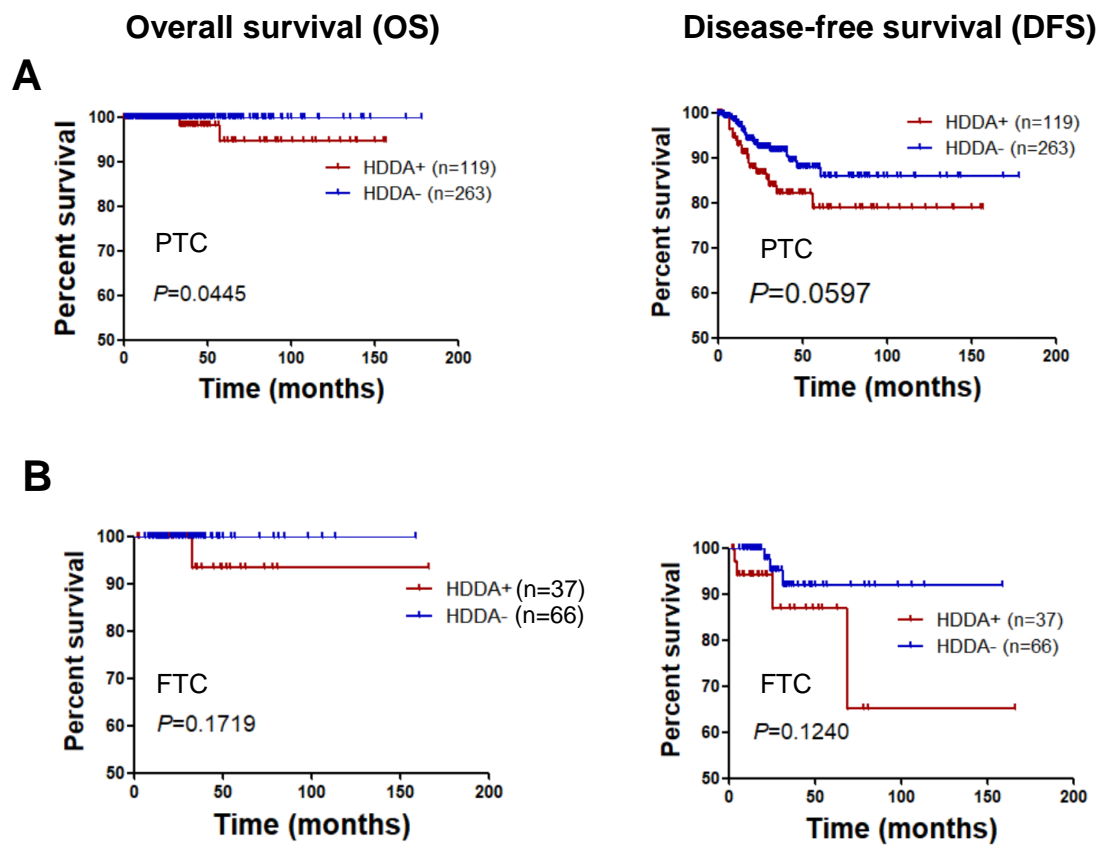

**Figure S1. The association between highly drifted DNAm age (HDDA) and survival in papillary and follicular thyroid carcinoma (PTC and FTC). (A) PTC. (B) FTC. Left: Overall survival. Right: disease-free survival.**

**Table S1. DNA methylation age in paired NT and tumor specimens from 54 TC<sup>1</sup> patients.**

| Patient ID       | Gender | Chronological age | DNAm age (NT) | Difference | DNAm age (T <sup>2</sup> ) | Difference |
|------------------|--------|-------------------|---------------|------------|----------------------------|------------|
| TCGA-EL-A3MY-11A | Male   | 81                | 60            | -21        | 56                         | -25        |
| TCGA-EL-A3ZO-11A | Female | 79                | 64            | -15        | 52                         | -27        |
| TCGA-BJ-A2NA-11A | Male   | 77                | 63            | -14        | 65                         | -12        |
| TCGA-EM-A1CT-11A | Male   | 76                | 66            | -10        | 64                         | -12        |
| TCGA-EM-A1YC-11A | Female | 71                | 65            | -6         | 51                         | -20        |
| TCGA-BJ-A290-11A | Male   | 70                | 58            | -12        | 53                         | -17        |
| TCGA-BJ-A3PR-11A | Female | 69                | 59            | -10        | 61                         | -8         |
| TCGA-EL-A3H1-11A | Female | 66                | 60            | -6         | 90                         | 24         |
| TCGA-EL-A3MX-11A | Female | 66                | 54            | -12        | 54                         | -12        |
| TCGA-ET-A3DW-11A | Male   | 64                | 54            | -10        | 63                         | -1         |
| TCGA-EL-A3T3-11A | Male   | 63                | 56            | -7         | 56                         | -7         |
| TCGA-EM-A3ST-11A | Female | 62                | 60            | -2         | 61                         | -1         |
| TCGA-FY-A3TY-11A | Female | 61                | 53            | -8         | 60                         | -1         |
| TCGA-EL-A3H2-11A | Male   | 58                | 60            | 2          | 60                         | 2          |
| TCGA-EL-A3MW-11A | Female | 55                | 51            | -4         | 68                         | 13         |
| TCGA-EL-A3T2-11A | Female | 55                | 49            | -6         | 64                         | 9          |
| TCGA-EM-A1CS-11A | Female | 55                | 52            | -3         | 64                         | 9          |
| TCGA-EL-A3N3-11A | Female | 53                | 53            | 0          | 44                         | -9         |
| TCGA-EM-A1YD-11A | Female | 53                | 46            | -7         | 55                         | 2          |
| TCGA-BJ-A3PU-11A | Male   | 52                | 47            | -5         | 68                         | 16         |
| TCGA-EL-A3T7-11A | Female | 47                | 51            | 4          | 40                         | -7         |
| TCGA-EL-A3TB-11A | Female | 47                | 43            | -4         | 42                         | -5         |
| TCGA-EM-A1YE-11A | Female | 47                | 47            | 0          | 66                         | 19         |
| TCGA-EL-A3T0-11A | Female | 45                | 43            | -2         | 55                         | 10         |
| TCGA-ET-A3DP-11A | Female | 43                | 37            | -6         | 64                         | 21         |
| TCGA-BJ-A2N9-11A | Female | 42                | 38            | -4         | 35                         | -7         |
| TCGA-EL-A3TA-11A | Female | 42                | 36            | -6         | 52                         | 10         |
| TCGA-EL-A3ZH-11A | Female | 42                | 46            | 4          | 64                         | 22         |
| TCGA-EL-A3ZK-11A | Female | 41                | 35            | -6         | 53                         | 12         |
| TCGA-ET-A25J-11A | Female | 40                | 35            | -5         | 36                         | -4         |
| TCGA-EM-A1CW-11A | Female | 39                | 36            | -3         | 43                         | 4          |
| TCGA-BJ-A28R-11A | Female | 38                | 36            | -2         | 50                         | 12         |
| TCGA-EL-A3T1-11A | Female | 38                | 40            | 2          | 18                         | -20        |
| TCGA-EL-A3H7-11A | Female | 36                | 31            | -5         | 57                         | 21         |
| TCGA-EL-A3T8-11A | Female | 36                | 33            | -3         | 80                         | 44         |
| TCGA-BJ-A28T-11A | Female | 34                | 35            | 1          | 37                         | 3          |
| TCGA-EL-A3GZ-11A | Female | 34                | 40            | 6          | 60                         | 26         |
| TCGA-EL-A3T6-11A | Female | 34                | 36            | 2          | 30                         | -4         |
| TCGA-EL-A3ZL-11A | Female | 34                | 32            | -2         | 77                         | 43         |
| TCGA-GE-A2C6-11A | Female | 33                | 33            | 0          | 42                         | 9          |
| TCGA-BJ-A28W-11A | Female | 32                | 28            | -4         | 27                         | -5         |
| TCGA-BJ-A28X-11A | Female | 32                | 32            | 0          | 35                         | 3          |
| TCGA-EM-A1CV-11A | Female | 32                | 30            | -2         | 47                         | 15         |
| TCGA-EM-A1CU-11A | Female | 31                | 32            | 1          | 55                         | 24         |

|                  |        |    |    |    |    |    |
|------------------|--------|----|----|----|----|----|
| TCGA-BJ-A2N7-11A | Female | 30 | 30 | 0  | 47 | 17 |
| TCGA-BJ-A2N8-11A | Female | 30 | 33 | 3  | 47 | 17 |
| TCGA-H2-A3RI-11A | Female | 29 | 34 | 5  | 60 | 31 |
| TCGA-ET-A25N-11A | Female | 28 | 31 | 3  | 42 | 14 |
| TCGA-H2-A2K9-11A | Female | 25 | 27 | 2  | 38 | 13 |
| TCGA-EL-A3N2-11A | Female | 24 | 28 | 4  | 67 | 43 |
| TCGA-DO-A1JZ-11A | Female | 23 | 20 | -3 | 19 | -4 |
| TCGA-EL-A3ZP-11A | Female | 19 | 15 | -4 | 15 | -4 |
| TCGA-E8-A2JQ-11A | Female | 18 | 17 | -1 | 13 | -5 |
| TCGA-EL-A3ZG-11A | Female | 15 | 12 | -3 | 9  | -6 |

1 TC : Thyroid carcinoma; 2 T: Tumor

**Table S2. Differentially methylated CpGs.**

| Probe ID   | Gene name    | Highly drifted | Others      | deltaBeta    | t           | P.Value     | adj.P.Value |
|------------|--------------|----------------|-------------|--------------|-------------|-------------|-------------|
| cg00120783 |              | 0.510199367    | 0.571762006 | -0.061562639 | -3.4507866  | 0.000607681 | 0.044943828 |
| cg00164949 | C1QL1        | 0.483653165    | 0.385695137 | 0.097958028  | 4.481999037 | 9.23E-06    | 0.024800028 |
| cg00405086 | MED23        | 0.274141772    | 0.199110942 | 0.07503083   | 3.608691943 | 0.000339644 | 0.036424283 |
| cg00498604 | TLL1         | 0.230008861    | 0.156543161 | 0.0734657    | 4.041601317 | 6.17E-05    | 0.026295696 |
| cg00622702 | IFNAR1       | 0.660696203    | 0.597033435 | 0.063662768  | 3.487323698 | 0.000532172 | 0.042566653 |
| cg00950086 |              | 0.495886076    | 0.558664134 | -0.062778058 | -3.50681826 | 0.000495564 | 0.041544402 |
| cg00983904 | IFFO1        | 0.585862025    | 0.502521884 | 0.083340141  | 4.384347149 | 1.43E-05    | 0.025301671 |
| cg01047631 |              | 0.382440506    | 0.312550456 | 0.06989005   | 3.784936761 | 0.00017296  | 0.030748962 |
| cg01254505 | BST2         | 0.4225         | 0.36231459  | 0.06018541   | 3.615682719 | 0.000330842 | 0.036215027 |
| cg01310473 | CCDC146;FGL2 | 0.593170886    | 0.518524924 | 0.074645962  | 3.681887819 | 0.000257468 | 0.033787312 |
| cg01329005 | BST2         | 0.645282911    | 0.585245593 | 0.060037319  | 3.400050143 | 0.00072922  | 0.048096002 |
| cg01355957 | IFIT5        | 0.219756329    | 0.158832219 | 0.06092411   | 3.540558195 | 0.000437716 | 0.039656314 |
| cg01586116 | NCKAP5       | 0.415          | 0.333440426 | 0.081559574  | 3.644435072 | 0.000296845 | 0.035204041 |
| cg01742627 |              | 0.213772785    | 0.135451368 | 0.078321417  | 4.168671191 | 3.63E-05    | 0.025670665 |
| cg01743020 | MYT1L        | 0.456087342    | 0.527808511 | -0.071721169 | -3.70792938 | 0.000233043 | 0.033033192 |
| cg01790646 | HDAC4        | 0.235941139    | 0.168077812 | 0.067863328  | 4.102574314 | 4.79E-05    | 0.025670665 |
| cg01807407 | NRN1         | 0.265241139    | 0.200378419 | 0.06486272   | 3.776162739 | 0.000178983 | 0.030872582 |
| cg01817393 | GNAS         | 0.240491772    | 0.319144377 | -0.078652605 | -4.0456326  | 6.07E-05    | 0.026151927 |
| cg01821058 | MMP2         | 0.305377215    | 0.239255623 | 0.066121592  | 3.594064743 | 0.000358775 | 0.037038886 |
| cg02150820 | HRNBP3       | 0.422081013    | 0.492413982 | -0.070332969 | -4.30413773 | 2.03E-05    | 0.025501775 |
| cg02162404 |              | 0.536918354    | 0.464731307 | 0.072187047  | 3.337351335 | 0.000910681 | 0.05283613  |
| cg02181920 | TAP1         | 0.745139241    | 0.672965957 | 0.072173283  | 4.479905034 | 9.32E-06    | 0.024800028 |
| cg02216731 |              | 0.244431013    | 0.313491185 | -0.069060173 | -4.30452432 | 2.02E-05    | 0.025501775 |
| cg02318139 | ST8SIA4      | 0.326981013    | 0.265249544 | 0.061731469  | 3.525473593 | 0.00046275  | 0.040363794 |
| cg02333960 | COX19        | 0.354348734    | 0.414758663 | -0.060409928 | -3.73457572 | 0.000210321 | 0.032069602 |
| cg02371119 | PLD1         | 0.456355696    | 0.393802432 | 0.062553265  | 3.171222019 | 0.001613933 | 0.0681072   |
| cg02391713 |              | 0.574418354    | 0.470261094 | 0.10415726   | 4.012592701 | 6.95E-05    | 0.026323565 |
| cg02621151 |              | 0.484289241    | 0.40946079  | 0.07482845   | 3.44418644  | 0.000622345 | 0.045385063 |
| cg02685896 | PROCA1       | 0.451018987    | 0.340843465 | 0.110175522  | 5.418258471 | 9.49E-08    | 0.017693885 |
| cg02733847 | LY6G5C       | 0.240270253    | 0.171723708 | 0.068546545  | 3.985866754 | 7.76E-05    | 0.026628071 |
| cg02858512 | SMG6         | 0.600276582    | 0.518559574 | 0.081717008  | 3.869431253 | 0.000123968 | 0.028508303 |
| cg02933909 | PTCHD3       | 0.747074684    | 0.686439818 | 0.060634866  | 3.673019588 | 0.000266321 | 0.034181668 |
| cg02948656 |              | 0.527367089    | 0.587821884 | -0.060454796 | -3.49917696 | 0.000509623 | 0.04183981  |
| cg02978168 |              | 0.642083544    | 0.572809119 | 0.069274426  | 4.444640713 | 1.09E-05    | 0.024800028 |
| cg02989244 |              | 0.317817722    | 0.251279635 | 0.066538086  | 3.111631024 | 0.001970073 | 0.074401961 |
| cg03036557 | GPC5         | 0.307205696    | 0.242732827 | 0.064472869  | 3.438006264 | 0.000636375 | 0.045770854 |
| cg03056526 | EVX1         | 0.371786076    | 0.300571125 | 0.071214951  | 5.062744879 | 5.88E-07    | 0.019674773 |
| cg03271907 | MGMT         | 0.702586709    | 0.766686018 | -0.064099309 | -3.79115599 | 0.000168807 | 0.030607565 |
| cg03397307 | EFCAB4B      | 0.153259494    | 0.092360486 | 0.060899007  | 3.86121535  | 0.000128083 | 0.028612895 |
| cg03487935 |              | 0.576434177    | 0.516016717 | 0.06041746   | 3.707566847 | 0.000233368 | 0.033033192 |
| cg03627261 | ARL15        | 0.332126582    | 0.393500912 | -0.06137433  | -3.52934876 | 0.000456194 | 0.040196146 |
| cg03723247 |              | 0.301784177    | 0.226651064 | 0.075133113  | 3.405660409 | 0.000714744 | 0.047714092 |
| cg03850256 |              | 0.441677215    | 0.359943769 | 0.081733446  | 3.44305586  | 0.00062489  | 0.04540625  |
| cg03852144 | GLRX         | 0.701811392    | 0.628889058 | 0.072922335  | 4.704769149 | 3.32E-06    | 0.024800028 |

|            |              |             |             |              |             |             |             |
|------------|--------------|-------------|-------------|--------------|-------------|-------------|-------------|
| cg03884238 | C9orf152     | 0.741977848 | 0.804480243 | -0.062502395 | -3.38304003 | 0.000774797 | 0.049146619 |
| cg04015907 | FAM110A      | 0.275709494 | 0.18721155  | 0.088497944  | 4.515668796 | 7.93E-06    | 0.024800028 |
| cg04046669 | HORMAD2      | 0.517222785 | 0.44425076  | 0.072972025  | 3.786267372 | 0.000172064 | 0.030734493 |
| cg04122873 |              | 0.344572152 | 0.268127052 | 0.0764451    | 3.868241073 | 0.000124556 | 0.028524561 |
| cg04154027 | CMYA5        | 0.184513291 | 0.244711854 | -0.060198563 | -4.11918379 | 4.47E-05    | 0.025670665 |
| cg04254487 | TBPL1        | 0.777731646 | 0.715594833 | 0.062136813  | 3.398784462 | 0.000732523 | 0.048184639 |
| cg04257105 | GNAS         | 0.292449367 | 0.361157143 | -0.068707776 | -4.83411987 | 1.80E-06    | 0.024800028 |
| cg04373359 | TMEM30B      | 0.512310759 | 0.450810638 | 0.061500121  | 3.652724692 | 0.000287671 | 0.035052196 |
| cg04396998 | PPP1R15A     | 0.366539241 | 0.290254407 | 0.076284833  | 3.755864791 | 0.000193684 | 0.031272641 |
| cg04486778 |              | 0.304639873 | 0.234889362 | 0.069750512  | 3.844195577 | 0.000137021 | 0.02891693  |
| cg04522045 |              | 0.369321519 | 0.297024316 | 0.072297203  | 3.442114485 | 0.000627016 | 0.045476947 |
| cg05002602 | VTI1B        | 0.287225949 | 0.347700304 | -0.060474355 | -3.40459629 | 0.000717469 | 0.047768669 |
| cg05050657 |              | 0.349698734 | 0.280742553 | 0.068956181  | 3.392987452 | 0.000747831 | 0.048477979 |
| cg05127899 |              | 0.325705063 | 0.247837386 | 0.077867677  | 3.726175829 | 0.000217248 | 0.032372667 |
| cg05137450 |              | 0.279753797 | 0.211384195 | 0.068369603  | 3.439070448 | 0.000633938 | 0.045725997 |
| cg05213296 | RPF2         | 0.601837975 | 0.514374772 | 0.087463203  | 3.661815437 | 0.000277916 | 0.034656138 |
| cg05333568 | C1orf65      | 0.225255063 | 0.288338602 | -0.063083539 | -3.95108886 | 8.93E-05    | 0.027297078 |
| cg05404698 |              | 0.323468354 | 0.223088754 | 0.100379601  | 4.223717817 | 2.87E-05    | 0.025501775 |
| cg05457768 |              | 0.328953797 | 0.267374164 | 0.061579633  | 3.821343299 | 0.000149952 | 0.029609264 |
| cg05498007 | KATNAL2      | 0.470867722 | 0.382251672 | 0.08861605   | 3.669167278 | 0.000270255 | 0.034343897 |
| cg05529506 | KATNAL2      | 0.420472785 | 0.330469301 | 0.090003484  | 4.074930366 | 5.38E-05    | 0.025670665 |
| cg05589784 |              | 0.778929114 | 0.709792097 | 0.069137017  | 3.425117003 | 0.00066659  | 0.046393636 |
| cg05656374 | MX2          | 0.558903165 | 0.457758967 | 0.101144198  | 4.118519694 | 4.48E-05    | 0.025670665 |
| cg05810170 |              | 0.592663291 | 0.51412766  | 0.078535632  | 3.669815876 | 0.000269589 | 0.034314523 |
| cg05895665 |              | 0.489796203 | 0.403085714 | 0.086710488  | 3.76517787  | 0.000186803 | 0.031077892 |
| cg05905176 | TNFAIP8L3    | 0.148966456 | 0.072749848 | 0.076216608  | 4.753896444 | 2.63E-06    | 0.024800028 |
| cg05961294 |              | 0.616989873 | 0.548442249 | 0.068547624  | 3.622505795 | 0.000322459 | 0.036018892 |
| cg06085204 | XAF1         | 0.486503165 | 0.401908511 | 0.084594654  | 4.366515579 | 1.54E-05    | 0.025301671 |
| cg06127263 | DTHD1        | 0.732737975 | 0.669385714 | 0.06335226   | 3.605619712 | 0.000343581 | 0.036547752 |
| cg06192883 | MYO5C        | 0.407660759 | 0.312575076 | 0.095085684  | 4.233750348 | 2.75E-05    | 0.025501775 |
| cg06455149 |              | 0.58009557  | 0.513389058 | 0.066706512  | 3.511491539 | 0.000487146 | 0.041294231 |
| cg06523224 | BNC1         | 0.311474051 | 0.245122492 | 0.066351558  | 3.472426625 | 0.000561833 | 0.043492388 |
| cg06571387 | HOXD12       | 0.399324684 | 0.329262006 | 0.070062677  | 5.169383146 | 3.44E-07    | 0.019674773 |
| cg06644669 | KIAA1949     | 0.644908228 | 0.582427964 | 0.062480264  | 4.483522958 | 9.17E-06    | 0.024800028 |
| cg06666025 | CMTM2        | 0.475151266 | 0.388497264 | 0.086654001  | 3.894619573 | 0.000112118 | 0.028288787 |
| cg06874323 |              | 0.306722152 | 0.237434347 | 0.069287805  | 4.301248272 | 2.05E-05    | 0.025501775 |
| cg07077965 |              | 0.652320253 | 0.565358055 | 0.086962198  | 4.075475699 | 5.36E-05    | 0.025670665 |
| cg07095230 | TBX2         | 0.403685443 | 0.322442553 | 0.08124289   | 3.401241591 | 0.000726123 | 0.048044662 |
| cg07105596 | GNAS         | 0.235703797 | 0.31571155  | -0.080007753 | -4.62763779 | 4.75E-06    | 0.024800028 |
| cg07124687 |              | 0.279317089 | 0.191942857 | 0.087374231  | 4.176739407 | 3.51E-05    | 0.025670665 |
| cg07169660 | LOC100130581 | 0.499699367 | 0.59183769  | -0.092138323 | -4.18380302 | 3.40E-05    | 0.025670665 |
| cg07337434 | C9orf135     | 0.601156962 | 0.534817629 | 0.066339333  | 3.530478634 | 0.000454299 | 0.040185786 |
| cg07385423 | FCRLB        | 0.453925949 | 0.362183283 | 0.091742667  | 3.871126818 | 0.000123134 | 0.028508303 |
| cg07523753 | FLJ42875     | 0.489039873 | 0.426531915 | 0.062507959  | 3.46574755  | 0.000575627 | 0.044013509 |
| cg07673538 | FEZ2         | 0.467856329 | 0.385155319 | 0.08270101   | 4.034362313 | 6.36E-05    | 0.026295696 |
| cg07696842 | CHST11       | 0.266436076 | 0.199588146 | 0.06684793   | 3.599652904 | 0.00035135  | 0.036816236 |
| cg07851675 |              | 0.441127215 | 0.377984802 | 0.063142413  | 3.833691845 | 0.000142828 | 0.029270182 |

|            |              |             |             |              |             |             |             |
|------------|--------------|-------------|-------------|--------------|-------------|-------------|-------------|
| cg07905965 |              | 0.35701962  | 0.296337386 | 0.060682234  | 3.687218081 | 0.000252281 | 0.033641446 |
| cg08101264 | ACOT8;ZSWIM3 | 0.288520886 | 0.222941641 | 0.065579245  | 4.543592013 | 6.99E-06    | 0.024800028 |
| cg08167706 | AKR1B1       | 0.239201899 | 0.178350456 | 0.060851443  | 4.35936167  | 1.59E-05    | 0.025301671 |
| cg08215831 | CRH          | 0.410120253 | 0.476834347 | -0.066714093 | -3.90598806 | 0.000107128 | 0.02814167  |
| cg08241307 |              | 0.395884177 | 0.329515502 | 0.066368676  | 4.307030919 | 2.00E-05    | 0.025501775 |
| cg08244085 |              | 0.521421519 | 0.441960486 | 0.079461033  | 3.92092579  | 0.000100891 | 0.027847218 |
| cg08284263 |              | 0.737710759 | 0.661110942 | 0.076599817  | 3.427528356 | 0.000660838 | 0.046357123 |
| cg08343644 | GPR56        | 0.235252532 | 0.296484195 | -0.061231663 | -4.10361245 | 4.77E-05    | 0.025670665 |
| cg08520746 |              | 0.355756329 | 0.293368693 | 0.062387636  | 4.534736859 | 7.27E-06    | 0.024800028 |
| cg08793894 | NEURL4       | 0.59926962  | 0.528870821 | 0.0703988    | 4.048564535 | 6.00E-05    | 0.026151927 |
| cg08875705 | IFFO1        | 0.719925316 | 0.650051368 | 0.069873949  | 3.817848139 | 0.000152029 | 0.029695103 |
| cg09081997 |              | 0.646193038 | 0.565679331 | 0.080513707  | 3.605519561 | 0.00034371  | 0.036547752 |
| cg09084462 | NCRNA00202   | 0.249620886 | 0.18302614  | 0.066594746  | 4.784067945 | 2.28E-06    | 0.024800028 |
| cg09147131 | SLC16A3      | 0.25129557  | 0.178097872 | 0.073197697  | 3.895360548 | 0.000111786 | 0.028288787 |
| cg09180171 |              | 0.397586709 | 0.336848328 | 0.060738381  | 3.848274124 | 0.000134827 | 0.028869047 |
| cg09180564 | OLFM3        | 0.663737975 | 0.59608693  | 0.067651045  | 3.57895375  | 0.000379598 | 0.037790253 |
| cg09223687 |              | 0.235294304 | 0.296664134 | -0.06136983  | -4.56452725 | 6.35E-06    | 0.024800028 |
| cg09229918 | SYNGR3       | 0.270913291 | 0.196584195 | 0.074329097  | 4.072185248 | 5.44E-05    | 0.025767059 |
| cg09230905 | C11orf91     | 0.195573418 | 0.130867173 | 0.064706244  | 4.210365987 | 3.04E-05    | 0.025501775 |
| cg09326440 | HLA-E        | 0.491608228 | 0.426316717 | 0.065291511  | 3.545624573 | 0.000429596 | 0.039387861 |
| cg09359103 | KCNN3        | 0.379163291 | 0.317533435 | 0.061629856  | 3.478185646 | 0.000550188 | 0.04305808  |
| cg09384411 |              | 0.525420886 | 0.465085714 | 0.060335172  | 3.386516199 | 0.000765272 | 0.04892522  |
| cg09531959 | LST1         | 0.572998734 | 0.510944681 | 0.062054053  | 3.916129604 | 0.000102855 | 0.027847218 |
| cg09563922 |              | 0.272177215 | 0.204764742 | 0.067412474  | 4.330678404 | 1.81E-05    | 0.025501775 |
| cg09577367 | IL12RB1      | 0.720986709 | 0.646900304 | 0.074086405  | 4.852989051 | 1.64E-06    | 0.024800028 |
| cg09596958 | AGAP2        | 0.1901      | 0.252453495 | -0.062353495 | -4.11342271 | 4.58E-05    | 0.025670665 |
| cg09620840 | HLA-E        | 0.298451266 | 0.236825532 | 0.061625734  | 4.868136939 | 1.53E-06    | 0.024800028 |
| cg09655952 | PROK2        | 0.26196962  | 0.200255623 | 0.061713997  | 3.94294421  | 9.23E-05    | 0.027297078 |
| cg09761080 | LST1         | 0.580382911 | 0.50246535  | 0.077917562  | 4.462828577 | 1.01E-05    | 0.024800028 |
| cg09854734 | CMTM2        | 0.645772152 | 0.56502462  | 0.080747532  | 4.143025266 | 4.04E-05    | 0.025670665 |
| cg10012059 | STAP2        | 0.221713924 | 0.156653191 | 0.065060733  | 3.571753231 | 0.000389914 | 0.038203167 |
| cg10123662 | ARHGEF10L    | 0.612510759 | 0.549008511 | 0.063502249  | 3.958611209 | 8.66E-05    | 0.027105123 |
| cg10195962 |              | 0.433709494 | 0.356413678 | 0.077295816  | 3.612704645 | 0.000334565 | 0.036323533 |
| cg10302550 | GNAS         | 0.313789873 | 0.385277204 | -0.07148733  | -4.88962322 | 1.38E-06    | 0.024800028 |
| cg10356187 |              | 0.35613038  | 0.283186322 | 0.072944058  | 4.35588311  | 1.62E-05    | 0.025301671 |
| cg10381888 | HLA-L        | 0.717729114 | 0.654165653 | 0.06356346   | 3.600152186 | 0.000350693 | 0.036816236 |
| cg10513595 |              | 0.678313924 | 0.591176596 | 0.087137328  | 3.822681762 | 0.000149164 | 0.029609264 |
| cg10548038 | GPC5         | 0.220874684 | 0.152136474 | 0.068738209  | 3.960906476 | 8.58E-05    | 0.027105123 |
| cg10692140 |              | 0.556536076 | 0.489602736 | 0.06693334   | 3.445276201 | 0.000619902 | 0.045344118 |
| cg10766585 | SOD3         | 0.667990506 | 0.607989058 | 0.060001449  | 3.818755594 | 0.000151487 | 0.029695103 |
| cg10806586 | C14orf28     | 0.537866456 | 0.615613982 | -0.077747526 | -3.57294753 | 0.000388185 | 0.038141283 |
| cg10861751 | RGS1         | 0.514961392 | 0.448658967 | 0.066302426  | 3.977004834 | 8.04E-05    | 0.026794854 |
| cg10919522 | C14orf43     | 0.442787342 | 0.372664438 | 0.070122904  | 3.659186745 | 0.000280704 | 0.034766732 |
| cg10949007 | GLRX         | 0.583860759 | 0.505144985 | 0.078715775  | 3.874282552 | 0.000121597 | 0.028508303 |
| cg10984625 | LRRFIP1      | 0.760929114 | 0.695487538 | 0.065441576  | 4.832772554 | 1.81E-06    | 0.024800028 |
| cg10995755 | TPRKB        | 0.431518354 | 0.353037386 | 0.078480968  | 3.458366958 | 0.000591237 | 0.04447844  |
| cg11117438 |              | 0.262886076 | 0.338441945 | -0.075555869 | -4.30552689 | 2.02E-05    | 0.025501775 |

|            |          |             |             |              |             |             |             |
|------------|----------|-------------|-------------|--------------|-------------|-------------|-------------|
| cg11139090 | UNC5A    | 0.468582278 | 0.380881459 | 0.08770082   | 3.550854926 | 0.000421362 | 0.039172133 |
| cg11155687 |          | 0.592691772 | 0.527774772 | 0.064917     | 3.388636413 | 0.000759517 | 0.04876842  |
| cg11224765 | ODF3B    | 0.537467089 | 0.461960182 | 0.075506906  | 3.764924911 | 0.000186987 | 0.031077892 |
| cg11236452 | PCDHGA2  | 0.531956962 | 0.43881155  | 0.093145412  | 4.089672079 | 5.06E-05    | 0.025670665 |
| cg11238542 |          | 0.365937975 | 0.279005167 | 0.086932808  | 3.711396415 | 0.000229961 | 0.032935277 |
| cg11316887 | SVIL     | 0.778107595 | 0.71372614  | 0.064381455  | 4.394035035 | 1.37E-05    | 0.025301671 |
| cg11354682 | C19orf38 | 0.779886709 | 0.690042857 | 0.089843852  | 3.879305056 | 0.000119188 | 0.028506687 |
| cg11374933 |          | 0.708393038 | 0.64103465  | 0.067358388  | 3.498363217 | 0.000511142 | 0.041918381 |
| cg11460496 |          | 0.503827215 | 0.416344377 | 0.087482838  | 3.822863232 | 0.000149058 | 0.029609264 |
| cg11539674 | SND1     | 0.367546203 | 0.294198176 | 0.073348026  | 3.878177148 | 0.000119725 | 0.028506687 |
| cg11549953 |          | 0.296287975 | 0.221199392 | 0.075088583  | 3.647045914 | 0.000293926 | 0.035120189 |
| cg11660826 | ULBP1    | 0.188708861 | 0.121980851 | 0.06672801   | 4.458040896 | 1.03E-05    | 0.024800028 |
| cg11738486 | TRIP10   | 0.283627215 | 0.346155015 | -0.0625278   | -4.3229084  | 1.87E-05    | 0.025501775 |
| cg11806439 |          | 0.258360127 | 0.321269301 | -0.062909174 | -4.38982094 | 1.39E-05    | 0.025301671 |
| cg11931731 | KATNAL2  | 0.443970253 | 0.347929483 | 0.09604077   | 3.447306595 | 0.000615372 | 0.045195698 |
| cg11985341 | TMEM45B  | 0.391581013 | 0.45248845  | -0.060907437 | -3.70343492 | 0.000237097 | 0.033232589 |
| cg12111714 | ATP8A2   | 0.430641139 | 0.356874164 | 0.073766975  | 3.894188511 | 0.000112311 | 0.028288787 |
| cg12236164 |          | 0.494967089 | 0.419383891 | 0.075583198  | 3.60830916  | 0.000340132 | 0.036464992 |
| cg12242502 | GSTA1    | 0.632859494 | 0.695272644 | -0.062413151 | -3.95030531 | 8.96E-05    | 0.027297078 |
| cg12302982 |          | 0.619967722 | 0.536143769 | 0.083823953  | 3.579718127 | 0.000378518 | 0.037778643 |
| cg12434681 | HOXA3    | 0.347975949 | 0.420989666 | -0.073013716 | -3.64118323 | 0.000300519 | 0.03525501  |
| cg12442246 |          | 0.327488608 | 0.239721581 | 0.087767027  | 3.715975362 | 0.00022595  | 0.032804288 |
| cg12505153 | CFD      | 0.595858861 | 0.534344985 | 0.061513876  | 3.97016627  | 8.27E-05    | 0.026981582 |
| cg12578486 | UBAC2    | 0.619435443 | 0.556659271 | 0.062776173  | 3.614558515 | 0.000332243 | 0.036257899 |
| cg12666727 | HIVEP3   | 0.222286076 | 0.14180304  | 0.080483036  | 3.871555959 | 0.000122924 | 0.028508303 |
| cg12671030 |          | 0.290927848 | 0.228412766 | 0.062515082  | 3.549263984 | 0.00042385  | 0.03926202  |
| cg13231131 | DUSP27   | 0.608210759 | 0.543384195 | 0.064826565  | 3.372591032 | 0.000804095 | 0.049976017 |
| cg13326508 | MPP2     | 0.340094937 | 0.267105167 | 0.07298977   | 3.567088763 | 0.000396736 | 0.038453734 |
| cg13360395 |          | 0.380979114 | 0.317990274 | 0.06298884   | 3.619229603 | 0.000326459 | 0.036086161 |
| cg13522462 | ZNF284   | 0.198939873 | 0.265664134 | -0.06672426  | -3.98416568 | 7.81E-05    | 0.026725016 |
| cg13571293 |          | 0.718982911 | 0.651858055 | 0.067124857  | 3.896524621 | 0.000111267 | 0.028269738 |
| cg13656173 |          | 0.61691519  | 0.552626748 | 0.064288442  | 3.627936409 | 0.000315929 | 0.03580781  |
| cg13967811 | EPB41L4A | 0.63251519  | 0.560632523 | 0.071882667  | 3.992160216 | 7.56E-05    | 0.026554974 |
| cg13996522 | TRAF3    | 0.271767722 | 0.33942766  | -0.067659938 | -3.87530516 | 0.000121103 | 0.028508303 |
| cg14195925 | HRNBP3   | 0.153486709 | 0.216992401 | -0.063505692 | -4.84708854 | 1.69E-06    | 0.024800028 |
| cg14302936 | GLIPR2   | 0.735491772 | 0.675375988 | 0.060115784  | 3.610471609 | 0.000337382 | 0.036350891 |
| cg14440974 |          | 0.326886709 | 0.411366261 | -0.084479553 | -4.14946181 | 3.93E-05    | 0.025670665 |
| cg14514569 |          | 0.357658861 | 0.292585714 | 0.065073146  | 3.781439831 | 0.000175337 | 0.030814643 |
| cg14676825 | PROCA1   | 0.438808861 | 0.327144377 | 0.111664484  | 5.149361175 | 3.80E-07    | 0.019674773 |
| cg14775960 |          | 0.416322152 | 0.484861398 | -0.068539246 | -3.55967281 | 0.000407813 | 0.038703645 |
| cg15215155 | FLNC     | 0.451155696 | 0.385086626 | 0.06606907   | 3.42288697  | 0.000671952 | 0.046618903 |
| cg15281283 | MX2      | 0.572279747 | 0.462906079 | 0.109373668  | 4.474017739 | 9.57E-06    | 0.024800028 |
| cg15426869 |          | 0.476701899 | 0.40142462  | 0.075277279  | 3.664477947 | 0.000275118 | 0.034548078 |
| cg15448445 | CMKLR1   | 0.159958861 | 0.093982371 | 0.06597649   | 4.876355608 | 1.47E-06    | 0.024800028 |
| cg15465279 |          | 0.29891962  | 0.367045593 | -0.068125972 | -5.55617128 | 4.55E-08    | 0.016971569 |
| cg15554005 |          | 0.765037975 | 0.700010334 | 0.06502764   | 4.20242207  | 3.14E-05    | 0.02563568  |
| cg15560495 |          | 0.415187975 | 0.353657143 | 0.061530832  | 4.163367447 | 3.71E-05    | 0.025670665 |

|            |          |             |             |              |             |             |             |
|------------|----------|-------------|-------------|--------------|-------------|-------------|-------------|
| cg15852963 | SOX2OT   | 0.393448734 | 0.328385714 | 0.06506302   | 3.754610115 | 0.000194629 | 0.031304184 |
| cg15896259 | ENTPD4   | 0.699724684 | 0.634858663 | 0.064866021  | 3.546907041 | 0.000427563 | 0.039327153 |
| cg16206813 |          | 0.578896835 | 0.505421277 | 0.073475559  | 3.408563023 | 0.00070736  | 0.047473413 |
| cg16271437 |          | 0.703789241 | 0.643448936 | 0.060340304  | 3.871519707 | 0.000122942 | 0.028508303 |
| cg16385335 | IL18BP   | 0.435692405 | 0.368195137 | 0.067497268  | 3.565724378 | 0.000398752 | 0.038505326 |
| cg16426479 |          | 0.517796203 | 0.441820669 | 0.075975534  | 3.378947339 | 0.000786152 | 0.049446425 |
| cg16606773 | RIN2     | 0.158287342 | 0.226886322 | -0.06859898  | -4.36007655 | 1.59E-05    | 0.025301671 |
| cg16626067 | CMTM2    | 0.550260759 | 0.483438906 | 0.066821854  | 2.927468757 | 0.003577603 | 0.097356431 |
| cg16651780 | C16orf61 | 0.496967089 | 0.406442249 | 0.090524839  | 3.908364587 | 0.000106112 | 0.028123701 |
| cg16676676 | OBSCN    | 0.673781646 | 0.745986626 | -0.072204981 | -3.53012605 | 0.000454889 | 0.040185786 |
| cg16677191 | GLRX     | 0.667313924 | 0.594948024 | 0.0723659    | 4.059175637 | 5.74E-05    | 0.026062136 |
| cg16795307 | STARD13  | 0.687949367 | 0.623565653 | 0.064383714  | 4.49172674  | 8.84E-06    | 0.024800028 |
| cg17084763 |          | 0.598839241 | 0.526432219 | 0.072407022  | 3.878488549 | 0.000119577 | 0.028506687 |
| cg17096289 | HLA-C    | 0.519793671 | 0.429802432 | 0.089991239  | 4.122096209 | 4.41E-05    | 0.025670665 |
| cg17124224 | BNC1     | 0.202115823 | 0.141172036 | 0.060943786  | 3.88821109  | 0.000115027 | 0.028365033 |
| cg17239876 | KIAA1274 | 0.186150633 | 0.247444985 | -0.061294352 | -4.465657   | 9.94E-06    | 0.024800028 |
| cg17386213 | NR2E1    | 0.202305063 | 0.134131915 | 0.068173148  | 3.99012504  | 7.62E-05    | 0.026595062 |
| cg17414107 | GNAS     | 0.357822785 | 0.43548845  | -0.077665665 | -4.55697367 | 6.57E-06    | 0.024800028 |
| cg17493815 | GUCY1B3  | 0.551536709 | 0.463491793 | 0.088044916  | 5.299551248 | 1.76E-07    | 0.019674773 |
| cg17608381 | HLA-A    | 0.79366962  | 0.732971125 | 0.060698496  | 4.139685666 | 4.10E-05    | 0.025670665 |
| cg17666539 | EVI5L    | 0.328614557 | 0.263568085 | 0.065046472  | 3.248397989 | 0.001240894 | 0.060366004 |
| cg17880320 | PEX19    | 0.519920253 | 0.584121884 | -0.064201631 | -3.57269333 | 0.000388552 | 0.038152629 |
| cg17941572 |          | 0.370129114 | 0.284491489 | 0.085637625  | 3.877826291 | 0.000119893 | 0.028506687 |
| cg18339788 |          | 0.193217089 | 0.126441337 | 0.066775751  | 3.564771798 | 0.000400166 | 0.038505326 |
| cg18537730 | IZUMO1   | 0.454603797 | 0.360075988 | 0.09452781   | 3.560057878 | 0.000407231 | 0.038686619 |
| cg18579761 |          | 0.314817722 | 0.384917325 | -0.070099604 | -3.61406708 | 0.000332857 | 0.036276015 |
| cg18634709 |          | 0.370422152 | 0.43175228  | -0.061330128 | -3.39116444 | 0.000752707 | 0.048619085 |
| cg18640030 | CRH      | 0.365631013 | 0.445013678 | -0.079382665 | -3.70297753 | 0.000237513 | 0.033247372 |
| cg18761422 |          | 0.643932911 | 0.571121884 | 0.072811027  | 3.848597554 | 0.000134654 | 0.028869047 |
| cg18792131 |          | 0.372051266 | 0.45511307  | -0.083061804 | -3.38221071 | 0.000777085 | 0.049224811 |
| cg18882687 | ARF1     | 0.639018354 | 0.572561702 | 0.066456652  | 3.373087301 | 0.00080268  | 0.049946955 |
| cg19029181 | ZIC1     | 0.416732911 | 0.346429179 | 0.070303732  | 3.6092515   | 0.000338931 | 0.036388563 |
| cg19094438 | BCAR1    | 0.601586709 | 0.533890578 | 0.067696131  | 4.039157885 | 6.23E-05    | 0.026295696 |
| cg19167683 | SLC43A3  | 0.363043038 | 0.284650152 | 0.078392886  | 3.533394938 | 0.000449441 | 0.039997659 |
| cg19279342 | CFD      | 0.299177215 | 0.222595441 | 0.076581774  | 3.716261412 | 0.000225701 | 0.032804288 |
| cg19457763 | ASAM     | 0.59035     | 0.526737082 | 0.063612918  | 3.779229989 | 0.000176856 | 0.030814643 |
| cg19495714 | SIVA1    | 0.80469557  | 0.731141337 | 0.073554232  | 3.680911219 | 0.000258429 | 0.033789497 |
| cg19500334 |          | 0.652573418 | 0.589712462 | 0.062860956  | 3.478176444 | 0.000550206 | 0.04305808  |
| cg19501909 |          | 0.629347468 | 0.563566261 | 0.065781207  | 3.838154787 | 0.000140333 | 0.029141242 |
| cg19640589 | GNAS     | 0.335725949 | 0.416308511 | -0.080582561 | -4.33788459 | 1.75E-05    | 0.025501775 |
| cg19680672 | MGMT     | 0.524105696 | 0.610570517 | -0.086464821 | -3.85314293 | 0.000132251 | 0.028857612 |
| cg19697239 | NINJ2    | 0.276079747 | 0.208796049 | 0.067283698  | 3.585877976 | 0.000369919 | 0.037441467 |
| cg19713429 | CAPZB    | 0.383163924 | 0.323044377 | 0.060119547  | 3.724080722 | 0.000219009 | 0.032444305 |
| cg20164887 | TYMP     | 0.502289873 | 0.417224012 | 0.085065861  | 3.82086335  | 0.000150236 | 0.029609264 |
| cg20178976 |          | 0.684751266 | 0.623019757 | 0.061731509  | 3.633545583 | 0.000309315 | 0.035542082 |
| cg20274304 | PNOC     | 0.356878481 | 0.43993769  | -0.083059209 | -4.13670732 | 4.15E-05    | 0.025670665 |
| cg20294304 | HMGA1    | 0.330648734 | 0.269410942 | 0.061237792  | 3.462984148 | 0.000581426 | 0.044160092 |



|            |           |             |             |              |             |             |             |
|------------|-----------|-------------|-------------|--------------|-------------|-------------|-------------|
| cg20386316 |           | 0.272712658 | 0.20392766  | 0.068784999  | 3.478982504 | 0.000548594 | 0.043027329 |
| cg20528093 | PAX6      | 0.336629747 | 0.268144073 | 0.068485674  | 3.567034595 | 0.000396816 | 0.038453734 |
| cg20594303 |           | 0.332572785 | 0.267002128 | 0.065570657  | 2.982504499 | 0.003002664 | 0.08993236  |
| cg20673075 | STK3      | 0.486462025 | 0.423698176 | 0.062763849  | 3.906270716 | 0.000107007 | 0.02814167  |
| cg20773915 | CHD5      | 0.725543671 | 0.789739514 | -0.064195843 | -3.3900787  | 0.000755625 | 0.048709187 |
| cg20939662 | LHX2      | 0.521250633 | 0.437221884 | 0.084028748  | 4.107273474 | 4.70E-05    | 0.025670665 |
| cg21172319 | NAT1      | 0.373748101 | 0.300084195 | 0.073663907  | 3.675470186 | 0.000263846 | 0.034030116 |
| cg21176130 | HLA-E     | 0.383825316 | 0.297459878 | 0.086365438  | 4.255849882 | 2.50E-05    | 0.025501775 |
| cg21330896 | ZNF395    | 0.722670253 | 0.655525532 | 0.067144721  | 3.478178169 | 0.000550203 | 0.04305808  |
| cg21354781 |           | 0.691974684 | 0.617500608 | 0.074474076  | 3.644804602 | 0.00029643  | 0.035179767 |
| cg21501525 |           | 0.666116456 | 0.606079635 | 0.06003682   | 4.625200493 | 4.80E-06    | 0.024800028 |
| cg21870299 |           | 0.638151899 | 0.70144772  | -0.063295822 | -3.38937076 | 0.000757533 | 0.048720505 |
| cg21884062 | MIR548F5  | 0.691217089 | 0.627504863 | 0.063712225  | 3.727958561 | 0.00021576  | 0.032308619 |
| cg21990700 | LOC283314 | 0.383044304 | 0.317269909 | 0.065774395  | 3.69123044  | 0.000248441 | 0.033531083 |
| cg22084642 | DNAH1     | 0.348098101 | 0.265951368 | 0.082146733  | 3.560837555 | 0.000406054 | 0.038681088 |
| cg22111078 |           | 0.279589873 | 0.215710942 | 0.063878931  | 3.434865392 | 0.000643618 | 0.045917241 |
| cg22164298 | ANK2      | 0.773514557 | 0.712171733 | 0.061342824  | 3.914743599 | 0.000103429 | 0.027847218 |
| cg22254983 |           | 0.390047468 | 0.329372644 | 0.060674824  | 3.373476183 | 0.000801573 | 0.049903061 |
| cg22272840 | SOX7      | 0.619882278 | 0.552161702 | 0.067720576  | 3.382933047 | 0.000775092 | 0.049148605 |
| cg22371492 | PRRX1     | 0.713290506 | 0.647957447 | 0.06533306   | 3.625270692 | 0.000319119 | 0.035948124 |
| cg22372182 | C1orf65   | 0.193872785 | 0.277098784 | -0.083225999 | -4.20477248 | 3.11E-05    | 0.02563568  |
| cg22413056 | KIAA1949  | 0.534113924 | 0.46738693  | 0.066726994  | 4.045539017 | 6.07E-05    | 0.026151927 |
| cg22541038 |           | 0.329727848 | 0.253248328 | 0.07647952   | 4.467946787 | 9.83E-06    | 0.024800028 |
| cg22620090 |           | 0.544413924 | 0.454104255 | 0.090309669  | 3.461869878 | 0.00058378  | 0.044191496 |
| cg22647546 | FAM59B    | 0.437233544 | 0.372277508 | 0.064956037  | 3.498929197 | 0.000510085 | 0.041850107 |
| cg22689909 | GLRX      | 0.536518354 | 0.428396049 | 0.108122306  | 5.058824814 | 5.99E-07    | 0.019674773 |
| cg22749810 | RNF213    | 0.687637975 | 0.62518693  | 0.062451045  | 3.730481823 | 0.000213671 | 0.032173766 |
| cg22821981 | PARP15    | 0.59971962  | 0.528632219 | 0.071087401  | 4.032031812 | 6.42E-05    | 0.026295696 |
| cg23133355 |           | 0.368753165 | 0.443496353 | -0.074743188 | -4.20295947 | 3.14E-05    | 0.02563568  |
| cg23145794 | RALGAPA2  | 0.609906329 | 0.529602736 | 0.080303594  | 4.284415433 | 2.21E-05    | 0.025501775 |
| cg23224396 | SAMD4A    | 0.71366519  | 0.653413678 | 0.060251512  | 3.744835478 | 0.000202142 | 0.03156071  |
| cg23277659 | MKNK1     | 0.565770886 | 0.629396049 | -0.063625163 | -3.85638702 | 0.000130561 | 0.028763285 |
| cg23326313 |           | 0.300093038 | 0.234064742 | 0.066028296  | 3.975861181 | 8.08E-05    | 0.026794854 |
| cg23426945 |           | 0.470412025 | 0.377343465 | 0.09306856   | 3.935948219 | 9.50E-05    | 0.027532481 |
| cg23497383 | LOC151174 | 0.257262658 | 0.193317021 | 0.063945637  | 3.416718685 | 0.000686992 | 0.047127319 |
| cg23528751 | CCDC50    | 0.403311392 | 0.342984802 | 0.06032659   | 3.52428625  | 0.000464776 | 0.04043271  |
| cg23546474 | PAX3      | 0.505341772 | 0.421852584 | 0.083489189  | 4.154726262 | 3.85E-05    | 0.025670665 |
| cg23737737 | IFFO1     | 0.661267089 | 0.585186018 | 0.07608107   | 4.48243672  | 9.21E-06    | 0.024800028 |
| cg23747646 | ZNF76     | 0.390013924 | 0.451551368 | -0.061537444 | -3.74718089 | 0.000200314 | 0.031514344 |
| cg23762359 | KCNQ1DN   | 0.401961392 | 0.336419149 | 0.065542243  | 3.892232744 | 0.000113193 | 0.028334548 |
| cg23889684 | APOL3     | 0.343252532 | 0.252094833 | 0.091157699  | 3.551399797 | 0.000420512 | 0.039141962 |
| cg23971170 | LMX1A     | 0.589788608 | 0.504451976 | 0.085336632  | 3.44836753  | 0.000613018 | 0.045114885 |
| cg24043916 |           | 0.368557595 | 0.286230699 | 0.082326896  | 3.669877228 | 0.000269526 | 0.034314523 |
| cg24244374 |           | 0.580482911 | 0.509882371 | 0.070600541  | 4.226686499 | 2.83E-05    | 0.025501775 |
| cg24459409 | CCDC61    | 0.363812025 | 0.294641337 | 0.069170688  | 3.504240838 | 0.000500265 | 0.041679073 |
| cg24571822 | CUBN      | 0.309617722 | 0.249090274 | 0.060527448  | 3.573559615 | 0.000387301 | 0.038118862 |
| cg24590708 | MYO5C     | 0.528839241 | 0.440453799 | 0.088385441  | 3.984834158 | 7.79E-05    | 0.02669955  |

|            |             |             |             |              |             |             |             |
|------------|-------------|-------------|-------------|--------------|-------------|-------------|-------------|
| cg24611608 | EYA1        | 0.563303797 | 0.492127356 | 0.071176442  | 3.505020647 | 0.000498839 | 0.041664256 |
| cg24683680 | EVX2        | 0.285186709 | 0.21674924  | 0.068437469  | 3.503810823 | 0.000501054 | 0.041679073 |
| cg24841318 | PROCA1      | 0.489098101 | 0.396174772 | 0.092923329  | 4.807210841 | 2.04E-06    | 0.024800028 |
| cg25162921 | MTAP        | 0.223753797 | 0.284451672 | -0.060697874 | -3.77269149 | 0.00018142  | 0.030915543 |
| cg25200152 |             | 0.263753165 | 0.196724012 | 0.067029152  | 3.838759022 | 0.000139998 | 0.029131738 |
| cg25407540 | C9          | 0.732656962 | 0.668556535 | 0.064100427  | 3.558507356 | 0.00040958  | 0.038758861 |
| cg25597625 | KIAA0319    | 0.312368987 | 0.388909422 | -0.076540435 | -3.77320735 | 0.000181056 | 0.030915543 |
| cg25618573 | KLC2        | 0.289866456 | 0.215340729 | 0.074525726  | 3.481156849 | 0.000544268 | 0.04286099  |
| cg26118326 | MCL1        | 0.464484177 | 0.390618845 | 0.073865332  | 3.739819518 | 0.000206102 | 0.031809241 |
| cg26156321 |             | 0.717940506 | 0.655755319 | 0.062185187  | 3.817012727 | 0.000152529 | 0.029695103 |
| cg26166688 | COX17       | 0.367139241 | 0.303359878 | 0.063779362  | 4.209701569 | 3.05E-05    | 0.025501775 |
| cg26188685 | HDC         | 0.75081519  | 0.690793313 | 0.060021877  | 4.416544963 | 1.24E-05    | 0.025301671 |
| cg26234900 | TAP1        | 0.745009494 | 0.681224316 | 0.063785178  | 3.966881861 | 8.38E-05    | 0.027000047 |
| cg26328291 |             | 0.257655696 | 0.321862614 | -0.064206918 | -3.55538064 | 0.000414356 | 0.038916141 |
| cg26386409 |             | 0.437775316 | 0.365970517 | 0.0718048    | 3.512120759 | 0.000486022 | 0.041245888 |
| cg26426745 | C2CD4D      | 0.603376582 | 0.53596231  | 0.067414272  | 3.757076917 | 0.000192775 | 0.031237506 |
| cg26513854 |             | 0.665131013 | 0.603538906 | 0.061592107  | 3.868873751 | 0.000124243 | 0.028512522 |
| cg26534477 | G6PC3       | 0.657062025 | 0.596683283 | 0.060378743  | 4.049594604 | 5.97E-05    | 0.026151927 |
| cg26603179 | C1orf65     | 0.224610127 | 0.28476079  | -0.060150664 | -4.05764911 | 5.77E-05    | 0.026068606 |
| cg26689203 | MYOZ2       | 0.682163924 | 0.60739696  | 0.074766964  | 3.796959054 | 0.000165017 | 0.030467819 |
| cg26767059 | KLHL29      | 0.552448101 | 0.61963769  | -0.067189589 | -3.77190658 | 0.000181976 | 0.030915543 |
| cg26880239 | CD247       | 0.507874051 | 0.439709119 | 0.068164932  | 3.778522605 | 0.000177344 | 0.030822682 |
| cg26924440 | IFFO2       | 0.586327848 | 0.521467781 | 0.064860067  | 3.497387421 | 0.000512969 | 0.041980531 |
| cg26955987 | EFCAB4B     | 0.148785443 | 0.086669301 | 0.062116142  | 3.98908507  | 7.65E-05    | 0.026595062 |
| cg26978918 |             | 0.342139873 | 0.279506079 | 0.062633794  | 3.427717503 | 0.000660388 | 0.046357123 |
| cg27071793 |             | 0.57685443  | 0.513547112 | 0.063307318  | 3.395430615 | 0.000741344 | 0.048300264 |
| cg27507473 |             | 0.321575949 | 0.258257751 | 0.063318199  | 3.480166363 | 0.000546235 | 0.042897134 |
| cg27513586 | SNORD115-48 | 0.564850633 | 0.493283891 | 0.071566742  | 4.139040482 | 4.11E-05    | 0.025670665 |
| cg27534671 | THSD1       | 0.373741139 | 0.295797264 | 0.077943875  | 3.708739785 | 0.00023232  | 0.033014169 |
| cg27625456 | LGALS9      | 0.337967722 | 0.273123404 | 0.064844317  | 3.852227728 | 0.000132732 | 0.028869047 |

Table S3. Differentially expressed genes in tumors with highly drifted DNAm age (HDDA).

| Down-regulated genes |                    |                  |                    |                      |                      |
|----------------------|--------------------|------------------|--------------------|----------------------|----------------------|
| gene name            | DNAm age drift     | Others           | log2FC             | Pvalue               | Qvalue               |
| MATN1                | 0.0462460572176512 | 1.99970346905352 | -5.43431190047848  | 2.07814277418908e-40 | 4.3568263260874e-37  |
| IGF2                 | 2.15627997658626   | 22.1037850896855 | -3.35767702195521  | 4.37484993191997e-30 | 5.64422946601245e-27 |
| HP                   | 0.123161289616379  | 1.01505189998598 | -3.04293271075457  | 3.05456006214289e-21 | 2.13462839009419e-18 |
| MSMP                 | 4.72261462735139   | 20.1643398264954 | -2.09414845392052  | 2.02821278229437e-17 | 1.06303702452004e-14 |
| KRT6B                | 0.11863420296797   | 1.78667237168815 | -3.91268319384599  | 3.19872270841511e-16 | 1.49024936848717e-13 |
| KRT6A                | 0.435503318452817  | 4.25203850142891 | -3.28739904322553  | 8.77502147672271e-16 | 3.87301737388403e-13 |
| ALK                  | 0.32566206512111   | 1.2841848054869  | -1.97940525219283  | 1.34551024586126e-15 | 5.78638406245772e-13 |
| TCN1                 | 0.146468353790846  | 1.29587947220915 | -3.14527064936585  | 6.88948413701075e-15 | 2.51196582491183e-12 |
| BCHE                 | 0.383132964623263  | 1.3451517764067  | -1.81185189921183  | 2.12179222087791e-12 | 6.03164392009563e-10 |
| DPRX                 | 0.0135474615396093 | 4.36102025382782 | -8.33049932908969  | 4.70663665638418e-12 | 1.21445707693655e-09 |
| IGF1                 | 0.689765506796273  | 1.5789936340271  | -1.1948274640921   | 1.26840475638276e-11 | 3.08314269189153e-09 |
| KRT5                 | 0.394864086444318  | 2.15872062213189 | -2.45074848103182  | 4.09381129412445e-11 | 8.8027439775712e-09  |
| CD79B                | 1.28140613193535   | 2.53918797638956 | -0.986639402439997 | 1.27700455190462e-10 | 2.47246464377818e-08 |
| S100A2               | 7.30425135220795   | 16.2917603123622 | -1.15733417741495  | 1.28252101126104e-10 | 2.47246464377818e-08 |
| BST2                 | 19.0127725558547   | 31.6527611470165 | -0.735362425205325 | 3.15127322609e-10    | 5.87257272755349e-08 |
| NKG7                 | 2.03804139781006   | 3.92005924943796 | -0.943692103398921 | 3.8078640440564e-10  | 7.01818634581471e-08 |
| TYMP                 | 3.25425902277418   | 5.28779211185487 | -0.70033637188289  | 3.95877458033244e-10 | 7.17008229568538e-08 |
| CCL21                | 8.05404402248381   | 30.8144521597027 | -1.93582187909644  | 6.09772366165878e-10 | 1.03304061872062e-07 |
| PTPRCAP              | 9.655932891584     | 18.0503110136237 | -0.902536140945524 | 8.89191123099527e-10 | 1.43399168429089e-07 |
| CST7                 | 3.77913938551283   | 7.27676296212065 | -0.945239085895908 | 1.09118099441592e-09 | 1.72653656965508e-07 |
| KRT14                | 0.598588741970606  | 1.88524440866685 | -1.65511452033124  | 2.09245969101468e-09 | 3.10572866705293e-07 |
| LAG3                 | 0.500883485220174  | 1.05871842510548 | -1.07977199374226  | 2.11410715530436e-09 | 3.11033379024252e-07 |
| SFTPA2               | 2.25074643973019   | 9.03412346948936 | -2.00498109366399  | 5.94324046993818e-09 | 7.55151736074267e-07 |
| SLC5A5               | 1.26357827649044   | 5.53343183839577 | -2.13065947902417  | 6.69545754480956e-09 | 8.3803144732497e-07  |
| PDCD1                | 0.625675497408664  | 1.28424520350698 | -1.03743417371951  | 7.67773550749142e-09 | 9.26409927565799e-07 |
| CXCR3                | 0.826309169736672  | 1.46205648654269 | -0.82324546800771  | 8.30350400738747e-09 | 9.80749078957061e-07 |
| PIM2                 | 5.60560277659796   | 9.81545572294409 | -0.80818573635565  | 8.67125112478467e-09 | 1.01702254450971e-06 |
| KRT17                | 3.35439217463965   | 9.96437710019378 | -1.57072825148463  | 1.03634854008184e-08 | 1.1905231311132e-06  |
| SLAMF7               | 1.14841545965586   | 2.62299848442683 | -1.19157231705557  | 1.37135926452679e-08 | 1.53336250564289e-06 |
| GZMA                 | 3.94803511487323   | 7.5129051439079  | -0.928236065703254 | 1.47123449949113e-08 | 1.63414205466657e-06 |
| CD3D                 | 2.22879272532127   | 4.51046421538175 | -1.01701346861729  | 1.8044091512529e-08  | 1.96516560290998e-06 |
| CCL5                 | 10.2178414447259   | 19.1473535460218 | -0.906054549630119 | 1.82673549230087e-08 | 1.97664565657227e-06 |
| GZMM                 | 0.641815135409164  | 1.21667627417925 | -0.922715638543377 | 1.94234831296318e-08 | 2.07487920618824e-06 |
| ACAP1                | 0.608800498572895  | 1.0016422049172  | -0.718325812221102 | 4.21448273986941e-08 | 4.20379710932532e-06 |
| DPT                  | 3.05450937111354   | 7.71561181494927 | -1.33683989430949  | 6.85091675055658e-08 | 6.41919417543771e-06 |
| CHRD1                | 0.756602596933855  | 1.82546126180192 | -1.2706534202395   | 7.30941159905137e-08 | 6.8107472966272e-06  |
| JSRP1                | 0.427696800419854  | 1.07988981927135 | -1.33622380266458  | 8.09774328159619e-08 | 7.42160384256455e-06 |
| SECTM1               | 0.877667054200859  | 1.43775028668866 | -0.712067467716439 | 1.02470433851762e-07 | 8.8589387451637e-06  |
| FCER1G               | 10.9139109291289   | 17.3564364865965 | -0.669302598480641 | 1.12290642777299e-07 | 9.56009472416676e-06 |
| GZMK                 | 1.58757177983751   | 3.42346382195307 | -1.10863494378299  | 1.34897319401422e-07 | 1.10244482043344e-05 |
| CD3E                 | 1.24093702784802   | 2.29302930935444 | -0.885824888639655 | 1.35454237309775e-07 | 1.10244482043344e-05 |
| FGL2                 | 2.69095739679722   | 4.03949671505337 | -0.586056006921778 | 1.56893432917921e-07 | 1.23540688117341e-05 |
| CHGB                 | 3.96211325248831   | 10.1367409984921 | -1.35525187111983  | 1.59871192869238e-07 | 1.24714402176877e-05 |

|          |                   |                  |                    |                      |                      |
|----------|-------------------|------------------|--------------------|----------------------|----------------------|
| C16orf54 | 0.71358313372947  | 1.27488160142912 | -0.837209848664348 | 1.5913354799807e-07  | 1.24714402176877e-05 |
| CCL4     | 1.46942461059272  | 2.48193193210664 | -0.756212206718542 | 1.68319914997897e-07 | 1.30095005269343e-05 |
| CXCL9    | 12.1852817165268  | 27.6963041198122 | -1.18455386574012  | 1.82557375471787e-07 | 1.39175104609673e-05 |
| GBP5     | 0.693786549732549 | 1.34500347377134 | -0.955046122030545 | 1.91238697260384e-07 | 1.45133729884668e-05 |
| CORO1A   | 3.93109073329537  | 6.2113230712373  | -0.659970946112473 | 2.08656302061492e-07 | 1.55898574162614e-05 |
| MYL4     | 3.73708651206443  | 6.73061546705898 | -0.848824473178478 | 2.15569463030099e-07 | 1.59979249289417e-05 |
| CCR7     | 0.596268258316211 | 1.09206701799307 | -0.873027950678045 | 2.67048359913157e-07 | 1.93057547088943e-05 |
| XCL2     | 0.758109246876989 | 1.46975996792537 | -0.955102895109105 | 2.79174680184745e-07 | 2.00099048549511e-05 |
| LCK      | 0.712590724738028 | 1.18887028732908 | -0.738445707019658 | 2.86440581343452e-07 | 2.04433252352867e-05 |
| CYTH4    | 1.08546731582505  | 1.67457838670748 | -0.625481623858668 | 3.01034948715251e-07 | 2.13938905078482e-05 |
| CD48     | 1.70510098386743  | 2.91755295181313 | -0.774901655439739 | 3.6331489202195e-07  | 2.5284304435652e-05  |
| SASH3    | 3.22821960368514  | 5.23351785034626 | -0.697042295875958 | 3.91909133350298e-07 | 2.70497941751078e-05 |
| IL2RB    | 2.43547171748509  | 3.98713608927611 | -0.711151618744071 | 4.02881190735813e-07 | 2.75800952286574e-05 |
| CD8A     | 1.86986389187489  | 3.11600694913645 | -0.736765191219656 | 4.4473630049544e-07  | 2.95996715551965e-05 |
| RUNX3    | 0.729847112488551 | 1.21667362504668 | -0.7372760276324   | 4.76710120754447e-07 | 3.07166872862051e-05 |
| STAT4    | 0.727146183082054 | 1.19319080919148 | -0.714507437068976 | 4.75291543109267e-07 | 3.07166872862051e-05 |
| BATF     | 1.05394519625869  | 1.86222488594219 | -0.821227455397804 | 4.86065706101088e-07 | 3.11156260409444e-05 |
| HSPA6    | 2.34635237434976  | 3.75427973485344 | -0.67811645765894  | 6.60617951278784e-07 | 4.04343680516434e-05 |
| LGALS2   | 0.715543382061852 | 1.48688123117898 | -1.05517827003976  | 6.96033519148403e-07 | 4.19923531768238e-05 |
| PRF1     | 1.16877784930225  | 1.79012951158355 | -0.615063225264831 | 7.13227975590034e-07 | 4.25703188846835e-05 |
| LIMD2    | 1.2522762113272   | 1.93936055782144 | -0.631028239336705 | 8.08568908640487e-07 | 4.69161404099167e-05 |
| HCST     | 6.42481963363026  | 9.7656157537953  | -0.604055060032376 | 8.16068636153952e-07 | 4.70347187820415e-05 |
| IL2RG    | 2.40472914799067  | 4.2287479688744  | -0.814356171088695 | 9.22993107638947e-07 | 5.16014680044014e-05 |
| SRPX     | 1.62088550255325  | 2.45338338507232 | -0.597990514265743 | 1.07747083873155e-06 | 5.86731847636545e-05 |
| HSPA7    | 1.92677187591746  | 3.01675705082122 | -0.646812745350922 | 1.10548393990721e-06 | 5.98102472262054e-05 |
| CD79A    | 4.92027946678903  | 12.7305788338646 | -1.37148585058625  | 1.15593609553809e-06 | 6.23387787600154e-05 |
| CXCL11   | 1.20980406457412  | 2.51937529913325 | -1.05829263654698  | 1.34890912245508e-06 | 7.15946322842299e-05 |
| WAS      | 1.61472238651555  | 2.47412096364798 | -0.61562988885331  | 1.51284892224516e-06 | 7.83132781601724e-05 |
| LSP1     | 3.09736522501363  | 4.83285156766656 | -0.641833177612922 | 1.69994913570983e-06 | 8.56202609733492e-05 |
| SLAMF6   | 0.6234982216057   | 1.15801852719836 | -0.893200985067657 | 1.7066035380598e-06  | 8.56980674860446e-05 |
| CCL19    | 4.6409169786707   | 13.0182020014135 | -1.48804841109671  | 1.74551506972162e-06 | 8.71302938969376e-05 |
| CD5      | 0.989000486862158 | 1.7549833732869  | -0.827414226198515 | 1.91290847037424e-06 | 9.46410055018196e-05 |
| APOD     | 4.88913511566315  | 8.42582511595392 | -0.785238695963168 | 1.93746523214595e-06 | 9.52937444972196e-05 |
| BATF2    | 0.784411033769986 | 1.19400628260894 | -0.60612869359602  | 1.97090836231469e-06 | 9.63659028432965e-05 |
| CD2      | 3.98555121725524  | 6.85062100155038 | -0.781455504423324 | 2.22713203498685e-06 | 0.000105221009833238 |
| POU2AF1  | 0.905108952991925 | 1.74671762265223 | -0.948483025588551 | 2.29137625217469e-06 | 0.000107649754906089 |
| GZMH     | 1.15015275473495  | 1.9229136690387  | -0.741468511102876 | 2.34503371019301e-06 | 0.000109556839519101 |
| CD37     | 1.23873378887029  | 1.91991313918146 | -0.632174864738237 | 3.58569972013019e-06 | 0.000156612905484436 |
| BIN2     | 0.907555452271279 | 1.38326436325372 | -0.608019203628562 | 3.72426326323673e-06 | 0.000161822133292763 |
| C1QB     | 27.4875368934682  | 41.5621094396135 | -0.59649124306552  | 4.4788419103268e-06  | 0.000188741549045229 |
| MSC      | 0.657816976737413 | 1.07031838757449 | -0.702281872520355 | 4.58934953449653e-06 | 0.000191951547113655 |
| CSF2RB   | 1.08763826142954  | 1.63977958190929 | -0.592303092614142 | 5.24119293735646e-06 | 0.000209797823258574 |
| NCF1C    | 0.755074269116352 | 1.30674660301703 | -0.791288948876518 | 5.55798558798827e-06 | 0.000220374785536027 |
| NAPSB    | 2.43588547619777  | 3.72718962589673 | -0.613641913879329 | 5.98641776557302e-06 | 0.000232956377643134 |
| RRAD     | 3.38527692042172  | 5.79026449048184 | -0.774355396722097 | 6.07108762570057e-06 | 0.000235704355690394 |
| CXCL10   | 5.7706130280828   | 10.6038702217019 | -0.877794425033068 | 7.07269426547357e-06 | 0.00026656905218095  |
| VPREB3   | 0.588275063311759 | 1.14205557934849 | -0.957070075164078 | 7.44784614787748e-06 | 0.000277589501316002 |

|          |                   |                  |                    |                      |                      |
|----------|-------------------|------------------|--------------------|----------------------|----------------------|
| PI16     | 1.00387943929258  | 1.98178341401197 | -0.981213281761412 | 8.88644239140008e-06 | 0.000322716071205106 |
| CD52     | 14.392033431629   | 22.1967873898212 | -0.625080442957639 | 1.19428829153764e-05 | 0.000416436657498322 |
| CD53     | 5.63514387202451  | 8.51412428662169 | -0.595405705687576 | 1.277104906013e-05   | 0.000438926300894467 |
| PLEK     | 4.17807170051278  | 6.28018715129303 | -0.587970301541272 | 1.62676283132205e-05 | 0.000532891918104169 |
| CCR5     | 1.10205976823122  | 1.71558943711887 | -0.638501870438692 | 1.6320277208377e-05  | 0.00053357444315575  |
| IDO1     | 0.761682062512327 | 1.37535993190034 | -0.852548395569655 | 1.8407371283684e-05  | 0.000588958081040453 |
| CTSW     | 2.28456529311849  | 3.46828167667699 | -0.602301396357868 | 2.01378052307503e-05 | 0.000628959533203248 |
| KLRB1    | 1.15654730329538  | 1.82905796703717 | -0.661276524077056 | 2.13802314999049e-05 | 0.000660385345702404 |
| CYTIP    | 1.47864965082602  | 2.29483446043294 | -0.634109824739673 | 2.66607091061832e-05 | 0.000798488237730186 |
| PTPRC    | 2.00468419356792  | 3.12498337074105 | -0.640473531959733 | 2.83125103183848e-05 | 0.000841414769845367 |
| WIF1     | 0.360204695460868 | 2.34762235809112 | -2.70431146033176  | 2.97970846131535e-05 | 0.000873700529950719 |
| CLEC10A  | 0.650440456896849 | 1.05089722948104 | -0.692132690708977 | 3.41019931662172e-05 | 0.000974375859256892 |
| HLA-DRB6 | 9.60075385573885  | 14.7626888278709 | -0.620735916596503 | 3.98985314547926e-05 | 0.00109419450968806  |
| SAA1     | 0.701516095007068 | 1.63407231273612 | -1.21992371925487  | 4.26211305047103e-05 | 0.00115857633845219  |
| MT1A     | 1.35904916882704  | 2.19947414327132 | -0.694560989127169 | 4.86161103598624e-05 | 0.0012963265547784   |
| SELE     | 1.24801098590844  | 2.03778619567832 | -0.707372058109629 | 5.95988514069837e-05 | 0.00150995760694551  |
| TNFRSF17 | 0.567958735582707 | 1.2839768904674  | -1.17676121525958  | 6.55777001904281e-05 | 0.00163914931087013  |
| PAX9     | 0.757598829364847 | 1.23885510871562 | -0.709501459118303 | 7.89149442546377e-05 | 0.00190883699483943  |
| PODN     | 0.907672040860992 | 1.42964207170309 | -0.655410972270763 | 8.45814911433768e-05 | 0.00202657252779531  |
| TPSAB1   | 0.832581658435283 | 1.38173698662322 | -0.730819343396853 | 8.60622166645248e-05 | 0.00205325106386545  |
| CAPN6    | 0.704409622727986 | 1.329555322308   | -0.916457285815213 | 0.000114488636394403 | 0.00256368946542981  |
| TFF3     | 33.1619623263594  | 63.2730790868421 | -0.932062424677554 | 0.000177127000318595 | 0.00370420704406916  |
| KLHDC7B  | 0.869162582961458 | 1.37674710275073 | -0.663565598832029 | 0.000198342492690586 | 0.00404695898711255  |
| ADRA2A   | 1.25319207863922  | 1.91562545747942 | -0.612207957688723 | 0.000212447837691884 | 0.0042469310295212   |
| HLA-DOA  | 7.20669549699787  | 10.8893946862148 | -0.595513966678015 | 0.000355980799779096 | 0.00634485650785866  |
| C7       | 4.25034854684148  | 7.33717214298336 | -0.787642980430915 | 0.000371361587993705 | 0.00655629110929517  |
| SMR3B    | 0.681247932660651 | 2.14740409828042 | -1.65634185110491  | 0.000418093417441062 | 0.00717000286024693  |
| ANKRD22  | 0.709385848124797 | 1.08786965292375 | -0.616863250502989 | 0.000448735989223624 | 0.00757162978999861  |
| TPSB2    | 1.59465960701675  | 2.5607947811158  | -0.683343139860437 | 0.000455731284162669 | 0.00765884278354337  |
| CD27     | 9.05501766276338  | 13.7185465666021 | -0.599338280550157 | 0.000470465367756529 | 0.00784358364613569  |
| VGf      | 0.894277608580427 | 1.90495476194867 | -1.09096207900511  | 0.000551944951738802 | 0.00894417461890162  |
| CXCL13   | 3.91915504890135  | 8.13895902055763 | -1.05430163471928  | 0.000986617628929939 | 0.0139877870753393   |
| SLC6A14  | 0.638354980472872 | 1.14746005351541 | -0.846013114796454 | 0.00107717604803628  | 0.0150053128552031   |
| LTF      | 1.95674577202423  | 2.98811130583212 | -0.610777561261136 | 0.00118885841973676  | 0.0161012583547126   |
| AREG     | 1.54115404555294  | 2.3223703529411  | -0.591586986774131 | 0.00121223475724861  | 0.0162925305944519   |
| S100B    | 2.51720108446041  | 4.04608586653621 | -0.684706467709691 | 0.00160200747290469  | 0.0203397951064023   |
| NAPSA    | 2.38000762665874  | 3.75157662021192 | -0.656530826768576 | 0.00186514726591514  | 0.0228171042625301   |
| MMP7     | 6.27668419909388  | 10.8512708959508 | -0.789789491294721 | 0.0019236573928072   | 0.0232614144139599   |
| CST1     | 1.64957194811478  | 4.11095839819027 | -1.31738306808566  | 0.00196946751855502  | 0.023644888490483    |
| SFTPb    | 111.555996942224  | 180.615773736556 | -0.695155822393449 | 0.00433370665976403  | 0.0418644356297517   |
| BIRC7    | 2.58585859403016  | 4.13984110389744 | -0.678932010535374 | 0.0044482500676253   | 0.0425747112445546   |
| STMN2    | 0.891606850565602 | 1.40164422904739 | -0.65264059863507  | 0.00973519461769488  | 0.0737816015038312   |
| CR2      | 0.954286584449515 | 1.55653878613622 | -0.705847030450496 | 0.0170208538021105   | 0.10822119842091     |
| C1QL2    | 1.01526100542538  | 1.54210200799998 | -0.603047534614884 | 0.03990370459756     | 0.187154623464842    |

Up-regulated genes

| gene name | DNA <sub>m</sub> age drift | REST               | log <sub>2</sub> FC | Pvalue               | Qvalue               |
|-----------|----------------------------|--------------------|---------------------|----------------------|----------------------|
| DHRS2     | 1.03230444031457           | 0.0549255665861028 | 4.23224684636633    | 1.33402851885783e-70 | 1.37229724633214e-66 |

|          |                  |                     |                   |                      |                      |
|----------|------------------|---------------------|-------------------|----------------------|----------------------|
| AKR1C2   | 3.69671996538597 | 0.224878401092519   | 4.03902875408615  | 1.63641455560713e-70 | 1.37229724633214e-66 |
| GPX2     | 1.00109973388594 | 0.0240006494475943  | 5.38236845353921  | 2.29466496948289e-67 | 9.62153021704175e-64 |
| AKR1B10  | 6.93972041826051 | 0.0711876253980997  | 6.60710725348711  | 1.08073755626169e-51 | 3.62522605872422e-48 |
| AKR1C1   | 3.72651768419518 | 0.523494811251087   | 2.83158096327788  | 2.06680752792303e-48 | 5.7774159763875e-45  |
| AKR1C3   | 5.45676143248165 | 1.28747504411027    | 2.08350050305887  | 3.09494126008042e-41 | 7.41547925915269e-38 |
| NPY      | 12.3346352329709 | 0.40145940086397    | 4.94131714482576  | 3.64016681828153e-31 | 5.08773982301815e-28 |
| THADA    | 5.7806729646805  | 2.69425334016315    | 1.10135194221521  | 2.63921813205028e-29 | 3.16178332219624e-26 |
| PDX1     | 1.16944093540137 | 0.00184713560143423 | 9.30631350147363  | 4.39990324589835e-24 | 3.883956696853e-21   |
| HHIPL2   | 1.52127748416874 | 0.332710128545257   | 2.19294563631285  | 4.81043935546889e-17 | 2.44486935969468e-14 |
| MYH2     | 1.49699712326867 | 0.0208184163643471  | 6.16806731031885  | 9.05826310124674e-15 | 3.1651080986273e-12  |
| UCHL1    | 2.87732071835422 | 1.511970393613      | 0.928296148987991 | 1.08801893415757e-11 | 2.68356670054277e-09 |
| CYP4F11  | 2.28919762557597 | 0.86061783382527    | 1.41139737418688  | 1.51173679107973e-11 | 3.57110555774496e-09 |
| OSGIN1   | 2.12433228444261 | 1.24570605511949    | 0.770045766856189 | 1.99619359333152e-11 | 4.6500220760217e-09  |
| KLK4     | 2.86064868817435 | 0.986613519793343   | 1.53578537123616  | 5.4553962483669e-09  | 7.03830045212382e-07 |
| SLC38A3  | 1.47268813258257 | 0.762109860028538   | 0.950381060967215 | 1.95463221188733e-08 | 2.07487920618824e-06 |
| AKR7A3   | 1.31092521434989 | 0.69919314345096    | 0.90682244263892  | 3.75323700831636e-08 | 3.79212597008928e-06 |
| CKMT2    | 2.98130384583408 | 1.60574999570935    | 0.892696125523506 | 9.8675320482967e-08  | 8.61970039135585e-06 |
| NPTX2    | 1.31106418035208 | 0.740934106813716   | 0.823321160601065 | 4.54233672639043e-07 | 2.99937289665434e-05 |
| PPY      | 6.49041164406634 | 0.620940421757264   | 3.38578322585993  | 5.06784530193292e-07 | 3.19540982721875e-05 |
| NQO1     | 45.0012058397775 | 27.6986846152936    | 0.700146194355874 | 9.29000974445781e-07 | 5.17647984830719e-05 |
| SLC30A3  | 1.253708923211   | 0.590009820882675   | 1.08739155898129  | 1.60305504582895e-06 | 8.19708513068391e-05 |
| HPDL     | 1.91526232690405 | 1.15748504008854    | 0.72654845917062  | 2.46889859453597e-06 | 0.00011502324229877  |
| DGAT2    | 5.44420229617573 | 3.61578638149577    | 0.590411228926867 | 2.78049214774998e-06 | 0.000127069248779462 |
| C1QL4    | 3.50093821888384 | 2.21607510309682    | 0.659734827373791 | 3.78296483378054e-06 | 0.000163105105892461 |
| SLC14A2  | 1.53015499718879 | 0.610463225576548   | 1.32570150353155  | 4.04850394605135e-06 | 0.000172777374511891 |
| ECEL1    | 1.31733250590117 | 0.69828751319131    | 0.915726460299963 | 6.85541907547184e-06 | 0.000260723557219532 |
| BEX1     | 20.5391653477424 | 12.474923691137     | 0.719346565242387 | 7.24074429079956e-06 | 0.000272290948980472 |
| TRIM54   | 1.44627153418836 | 0.911490236869917   | 0.666039331926126 | 8.22768959961693e-06 | 0.000302620197291174 |
| CNTFR    | 3.50429595875934 | 1.46732930054887    | 1.25593194487852  | 1.06710971587864e-05 | 0.000376790824309823 |
| ACTA1    | 2.65472820060966 | 1.10791724197967    | 1.2607140404356   | 3.38307847885278e-05 | 0.000968276318213631 |
| MYL1     | 1.25743202946284 | 0.190113952277476   | 2.7255440982361   | 9.17084536244563e-05 | 0.0021568463326072   |
| RPPH1    | 17.3344696669474 | 8.5807067011593     | 1.01447532210187  | 0.000406197865513757 | 0.00701622100967737  |
| MSI1     | 1.15918041359427 | 0.72116945051317    | 0.684694934208853 | 0.000414889241295003 | 0.00712963356045061  |
| EEF1A2   | 1.22223546025307 | 0.714477441258139   | 0.774561877267327 | 0.00087269483789717  | 0.0127055883864682   |
| GATA5    | 2.30956307857966 | 1.13241849151686    | 1.02821273684137  | 0.00089007616049858  | 0.0128803773631425   |
| PLA2G2A  | 3.16846339839765 | 1.76772426748929    | 0.841890091480981 | 0.00177613563247849  | 0.0219200491743408   |
| FLRT1    | 2.20858968773394 | 1.37355541259414    | 0.685210305948542 | 0.00249996527920254  | 0.0284653208844433   |
| GLDN     | 1.77827469209589 | 1.10553008301295    | 0.685739912681504 | 0.00259456393042313  | 0.0291405964482914   |
| SH3GL2   | 1.41007433490911 | 0.85916932152431    | 0.714756834356333 | 0.00290525642880367  | 0.0318268849274299   |
| PENK     | 1.78197816955538 | 0.960026684716777   | 0.892333250595388 | 0.00353151523035797  | 0.0363154956735524   |
| SCARNA10 | 1.49308024806746 | 0.825768958676364   | 0.854481615015921 | 0.00403123142247871  | 0.0400069901880549   |
| SST      | 2.04927724112729 | 0.879859943097662   | 1.2197693781934   | 0.013067524513919    | 0.0906779152451176   |
| LCN6     | 6.74198940733992 | 4.28090959239454    | 0.655256992745688 | 0.0138280399475891   | 0.0942396936208717   |
| KLK1     | 3.73551429011891 | 2.08764467253269    | 0.839430702001721 | 0.0203396422757953   | 0.121573941642779    |
| MYOC     | 1.18749333182813 | 0.784141279484035   | 0.598733897634714 | 0.0257659557617314   | 0.140984881012521    |

Table S3. Differentially expressed genes in tumors with highly drifted DNAm age (HDDA).

| Down-regulated genes |                    |                  |                    |                      |                      |
|----------------------|--------------------|------------------|--------------------|----------------------|----------------------|
| gene name            | DNAm age drift     | Others           | log2FC             | Pvalue               | Qvalue               |
| MATN1                | 0.0462460572176512 | 1.99970346905352 | -5.43431190047848  | 2.07814277418908e-40 | 4.3568263260874e-37  |
| IGF2                 | 2.15627997658626   | 22.1037850896855 | -3.35767702195521  | 4.37484993191997e-30 | 5.64422946601245e-27 |
| HP                   | 0.123161289616379  | 1.01505189998598 | -3.04293271075457  | 3.05456006214289e-21 | 2.13462839009419e-18 |
| MSMP                 | 4.72261462735139   | 20.1643398264954 | -2.09414845392052  | 2.02821278229437e-17 | 1.06303702452004e-14 |
| KRT6B                | 0.11863420296797   | 1.78667237168815 | -3.91268319384599  | 3.19872270841511e-16 | 1.49024936848717e-13 |
| KRT6A                | 0.435503318452817  | 4.25203850142891 | -3.28739904322553  | 8.77502147672271e-16 | 3.87301737388403e-13 |
| ALK                  | 0.32566206512111   | 1.2841848054869  | -1.97940525219283  | 1.34551024586126e-15 | 5.78638406245772e-13 |
| TCN1                 | 0.146468353790846  | 1.29587947220915 | -3.14527064936585  | 6.88948413701075e-15 | 2.51196582491183e-12 |
| BCHE                 | 0.383132964623263  | 1.3451517764067  | -1.81185189921183  | 2.12179222087791e-12 | 6.03164392009563e-10 |
| DPRX                 | 0.0135474615396093 | 4.36102025382782 | -8.33049932908969  | 4.70663665638418e-12 | 1.21445707693655e-09 |
| IGF1                 | 0.689765506796273  | 1.5789936340271  | -1.1948274640921   | 1.26840475638276e-11 | 3.08314269189153e-09 |
| KRT5                 | 0.394864086444318  | 2.15872062213189 | -2.45074848103182  | 4.09381129412445e-11 | 8.8027439775712e-09  |
| CD79B                | 1.28140613193535   | 2.53918797638956 | -0.986639402439997 | 1.27700455190462e-10 | 2.47246464377818e-08 |
| S100A2               | 7.30425135220795   | 16.2917603123622 | -1.15733417741495  | 1.28252101126104e-10 | 2.47246464377818e-08 |
| BST2                 | 19.0127725558547   | 31.6527611470165 | -0.735362425205325 | 3.15127322609e-10    | 5.87257272755349e-08 |
| NKG7                 | 2.03804139781006   | 3.92005924943796 | -0.943692103398921 | 3.8078640440564e-10  | 7.01818634581471e-08 |
| TYMP                 | 3.25425902277418   | 5.28779211185487 | -0.70033637188289  | 3.95877458033244e-10 | 7.17008229568538e-08 |
| CCL21                | 8.05404402248381   | 30.8144521597027 | -1.93582187909644  | 6.09772366165878e-10 | 1.03304061872062e-07 |
| PTPRCAP              | 9.655932891584     | 18.0503110136237 | -0.902536140945524 | 8.89191123099527e-10 | 1.43399168429089e-07 |
| CST7                 | 3.77913938551283   | 7.27676296212065 | -0.945239085895908 | 1.09118099441592e-09 | 1.72653656965508e-07 |
| KRT14                | 0.598588741970606  | 1.88524440866685 | -1.65511452033124  | 2.09245969101468e-09 | 3.10572866705293e-07 |
| LAG3                 | 0.500883485220174  | 1.05871842510548 | -1.07977199374226  | 2.11410715530436e-09 | 3.11033379024252e-07 |
| SFTPA2               | 2.25074643973019   | 9.03412346948936 | -2.00498109366399  | 5.94324046993818e-09 | 7.55151736074267e-07 |
| SLC5A5               | 1.26357827649044   | 5.53343183839577 | -2.13065947902417  | 6.69545754480956e-09 | 8.3803144732497e-07  |
| PDCD1                | 0.625675497408664  | 1.28424520350698 | -1.03743417371951  | 7.67773550749142e-09 | 9.26409927565799e-07 |
| CXCR3                | 0.826309169736672  | 1.46205648654269 | -0.82324546800771  | 8.30350400738747e-09 | 9.80749078957061e-07 |
| PIM2                 | 5.60560277659796   | 9.81545572294409 | -0.80818573635565  | 8.67125112478467e-09 | 1.01702254450971e-06 |
| KRT17                | 3.35439217463965   | 9.96437710019378 | -1.57072825148463  | 1.03634854008184e-08 | 1.1905231311132e-06  |
| SLAMF7               | 1.14841545965586   | 2.62299848442683 | -1.19157231705557  | 1.37135926452679e-08 | 1.53336250564289e-06 |
| GZMA                 | 3.94803511487323   | 7.5129051439079  | -0.928236065703254 | 1.47123449949113e-08 | 1.63414205466657e-06 |
| CD3D                 | 2.22879272532127   | 4.51046421538175 | -1.01701346861729  | 1.8044091512529e-08  | 1.96516560290998e-06 |
| CCL5                 | 10.2178414447259   | 19.1473535460218 | -0.906054549630119 | 1.82673549230087e-08 | 1.97664565657227e-06 |
| GZMM                 | 0.641815135409164  | 1.21667627417925 | -0.922715638543377 | 1.94234831296318e-08 | 2.07487920618824e-06 |
| ACAP1                | 0.608800498572895  | 1.0016422049172  | -0.718325812221102 | 4.21448273986941e-08 | 4.20379710932532e-06 |
| DPT                  | 3.05450937111354   | 7.71561181494927 | -1.33683989430949  | 6.85091675055658e-08 | 6.41919417543771e-06 |
| CHRD1                | 0.756602596933855  | 1.82546126180192 | -1.2706534202395   | 7.30941159905137e-08 | 6.8107472966272e-06  |
| JSRP1                | 0.427696800419854  | 1.07988981927135 | -1.33622380266458  | 8.09774328159619e-08 | 7.42160384256455e-06 |
| SECTM1               | 0.877667054200859  | 1.43775028668866 | -0.712067467716439 | 1.02470433851762e-07 | 8.8589387451637e-06  |
| FCER1G               | 10.9139109291289   | 17.3564364865965 | -0.669302598480641 | 1.12290642777299e-07 | 9.56009472416676e-06 |
| GZMK                 | 1.58757177983751   | 3.42346382195307 | -1.10863494378299  | 1.34897319401422e-07 | 1.10244482043344e-05 |
| CD3E                 | 1.24093702784802   | 2.29302930935444 | -0.885824888639655 | 1.35454237309775e-07 | 1.10244482043344e-05 |
| FGL2                 | 2.69095739679722   | 4.03949671505337 | -0.586056006921778 | 1.56893432917921e-07 | 1.23540688117341e-05 |
| CHGB                 | 3.96211325248831   | 10.1367409984921 | -1.35525187111983  | 1.59871192869238e-07 | 1.24714402176877e-05 |

|          |                   |                  |                    |                      |                      |
|----------|-------------------|------------------|--------------------|----------------------|----------------------|
| C16orf54 | 0.71358313372947  | 1.27488160142912 | -0.837209848664348 | 1.5913354799807e-07  | 1.24714402176877e-05 |
| CCL4     | 1.46942461059272  | 2.48193193210664 | -0.756212206718542 | 1.68319914997897e-07 | 1.30095005269343e-05 |
| CXCL9    | 12.1852817165268  | 27.6963041198122 | -1.18455386574012  | 1.82557375471787e-07 | 1.39175104609673e-05 |
| GBP5     | 0.693786549732549 | 1.34500347377134 | -0.955046122030545 | 1.91238697260384e-07 | 1.45133729884668e-05 |
| CORO1A   | 3.93109073329537  | 6.2113230712373  | -0.659970946112473 | 2.08656302061492e-07 | 1.55898574162614e-05 |
| MYL4     | 3.73708651206443  | 6.73061546705898 | -0.848824473178478 | 2.15569463030099e-07 | 1.59979249289417e-05 |
| CCR7     | 0.596268258316211 | 1.09206701799307 | -0.873027950678045 | 2.67048359913157e-07 | 1.93057547088943e-05 |
| XCL2     | 0.758109246876989 | 1.46975996792537 | -0.955102895109105 | 2.79174680184745e-07 | 2.00099048549511e-05 |
| LCK      | 0.712590724738028 | 1.18887028732908 | -0.738445707019658 | 2.86440581343452e-07 | 2.04433252352867e-05 |
| CYTH4    | 1.08546731582505  | 1.67457838670748 | -0.625481623858668 | 3.01034948715251e-07 | 2.13938905078482e-05 |
| CD48     | 1.70510098386743  | 2.91755295181313 | -0.774901655439739 | 3.6331489202195e-07  | 2.5284304435652e-05  |
| SASH3    | 3.22821960368514  | 5.23351785034626 | -0.697042295875958 | 3.91909133350298e-07 | 2.70497941751078e-05 |
| IL2RB    | 2.43547171748509  | 3.98713608927611 | -0.711151618744071 | 4.02881190735813e-07 | 2.75800952286574e-05 |
| CD8A     | 1.86986389187489  | 3.11600694913645 | -0.736765191219656 | 4.4473630049544e-07  | 2.95996715551965e-05 |
| RUNX3    | 0.729847112488551 | 1.21667362504668 | -0.7372760276324   | 4.76710120754447e-07 | 3.07166872862051e-05 |
| STAT4    | 0.727146183082054 | 1.19319080919148 | -0.714507437068976 | 4.75291543109267e-07 | 3.07166872862051e-05 |
| BATF     | 1.05394519625869  | 1.86222488594219 | -0.821227455397804 | 4.86065706101088e-07 | 3.11156260409444e-05 |
| HSPA6    | 2.34635237434976  | 3.75427973485344 | -0.67811645765894  | 6.60617951278784e-07 | 4.04343680516434e-05 |
| LGALS2   | 0.715543382061852 | 1.48688123117898 | -1.05517827003976  | 6.96033519148403e-07 | 4.19923531768238e-05 |
| PRF1     | 1.16877784930225  | 1.79012951158355 | -0.615063225264831 | 7.13227975590034e-07 | 4.25703188846835e-05 |
| LIMD2    | 1.2522762113272   | 1.93936055782144 | -0.631028239336705 | 8.08568908640487e-07 | 4.69161404099167e-05 |
| HCST     | 6.42481963363026  | 9.7656157537953  | -0.604055060032376 | 8.16068636153952e-07 | 4.70347187820415e-05 |
| IL2RG    | 2.40472914799067  | 4.2287479688744  | -0.814356171088695 | 9.22993107638947e-07 | 5.16014680044014e-05 |
| SRPX     | 1.62088550255325  | 2.45338338507232 | -0.597990514265743 | 1.07747083873155e-06 | 5.86731847636545e-05 |
| HSPA7    | 1.92677187591746  | 3.01675705082122 | -0.646812745350922 | 1.10548393990721e-06 | 5.98102472262054e-05 |
| CD79A    | 4.92027946678903  | 12.7305788338646 | -1.37148585058625  | 1.15593609553809e-06 | 6.23387787600154e-05 |
| CXCL11   | 1.20980406457412  | 2.51937529913325 | -1.05829263654698  | 1.34890912245508e-06 | 7.15946322842299e-05 |
| WAS      | 1.61472238651555  | 2.47412096364798 | -0.61562988885331  | 1.51284892224516e-06 | 7.83132781601724e-05 |
| LSP1     | 3.09736522501363  | 4.83285156766656 | -0.641833177612922 | 1.69994913570983e-06 | 8.56202609733492e-05 |
| SLAMF6   | 0.6234982216057   | 1.15801852719836 | -0.893200985067657 | 1.7066035380598e-06  | 8.56980674860446e-05 |
| CCL19    | 4.6409169786707   | 13.0182020014135 | -1.48804841109671  | 1.74551506972162e-06 | 8.71302938969376e-05 |
| CD5      | 0.989000486862158 | 1.7549833732869  | -0.827414226198515 | 1.91290847037424e-06 | 9.46410055018196e-05 |
| APOD     | 4.88913511566315  | 8.42582511595392 | -0.785238695963168 | 1.93746523214595e-06 | 9.52937444972196e-05 |
| BATF2    | 0.784411033769986 | 1.19400628260894 | -0.60612869359602  | 1.97090836231469e-06 | 9.63659028432965e-05 |
| CD2      | 3.98555121725524  | 6.85062100155038 | -0.781455504423324 | 2.22713203498685e-06 | 0.000105221009833238 |
| POU2AF1  | 0.905108952991925 | 1.74671762265223 | -0.948483025588551 | 2.29137625217469e-06 | 0.000107649754906089 |
| GZMH     | 1.15015275473495  | 1.9229136690387  | -0.741468511102876 | 2.34503371019301e-06 | 0.000109556839519101 |
| CD37     | 1.23873378887029  | 1.91991313918146 | -0.632174864738237 | 3.58569972013019e-06 | 0.000156612905484436 |
| BIN2     | 0.907555452271279 | 1.38326436325372 | -0.608019203628562 | 3.72426326323673e-06 | 0.000161822133292763 |
| C1QB     | 27.4875368934682  | 41.5621094396135 | -0.59649124306552  | 4.4788419103268e-06  | 0.000188741549045229 |
| MSC      | 0.657816976737413 | 1.07031838757449 | -0.702281872520355 | 4.58934953449653e-06 | 0.000191951547113655 |
| CSF2RB   | 1.08763826142954  | 1.63977958190929 | -0.592303092614142 | 5.24119293735646e-06 | 0.000209797823258574 |
| NCF1C    | 0.755074269116352 | 1.30674660301703 | -0.791288948876518 | 5.55798558798827e-06 | 0.000220374785536027 |
| NAPSB    | 2.43588547619777  | 3.72718962589673 | -0.613641913879329 | 5.98641776557302e-06 | 0.000232956377643134 |
| RRAD     | 3.38527692042172  | 5.79026449048184 | -0.774355396722097 | 6.07108762570057e-06 | 0.000235704355690394 |
| CXCL10   | 5.7706130280828   | 10.6038702217019 | -0.877794425033068 | 7.07269426547357e-06 | 0.00026656905218095  |
| VPREB3   | 0.588275063311759 | 1.14205557934849 | -0.957070075164078 | 7.44784614787748e-06 | 0.000277589501316002 |



|          |                   |                  |                    |                      |                      |
|----------|-------------------|------------------|--------------------|----------------------|----------------------|
| PI16     | 1.00387943929258  | 1.98178341401197 | -0.981213281761412 | 8.88644239140008e-06 | 0.000322716071205106 |
| CD52     | 14.392033431629   | 22.1967873898212 | -0.625080442957639 | 1.19428829153764e-05 | 0.000416436657498322 |
| CD53     | 5.63514387202451  | 8.51412428662169 | -0.595405705687576 | 1.277104906013e-05   | 0.000438926300894467 |
| PLEK     | 4.17807170051278  | 6.28018715129303 | -0.587970301541272 | 1.62676283132205e-05 | 0.000532891918104169 |
| CCR5     | 1.10205976823122  | 1.71558943711887 | -0.638501870438692 | 1.6320277208377e-05  | 0.00053357444315575  |
| IDO1     | 0.761682062512327 | 1.37535993190034 | -0.852548395569655 | 1.8407371283684e-05  | 0.000588958081040453 |
| CTSW     | 2.28456529311849  | 3.46828167667699 | -0.602301396357868 | 2.01378052307503e-05 | 0.000628959533203248 |
| KLRB1    | 1.15654730329538  | 1.82905796703717 | -0.661276524077056 | 2.13802314999049e-05 | 0.000660385345702404 |
| CYTIP    | 1.47864965082602  | 2.29483446043294 | -0.634109824739673 | 2.66607091061832e-05 | 0.000798488237730186 |
| PTPRC    | 2.00468419356792  | 3.12498337074105 | -0.640473531959733 | 2.83125103183848e-05 | 0.000841414769845367 |
| WIF1     | 0.360204695460868 | 2.34762235809112 | -2.70431146033176  | 2.97970846131535e-05 | 0.000873700529950719 |
| CLEC10A  | 0.650440456896849 | 1.05089722948104 | -0.692132690708977 | 3.41019931662172e-05 | 0.000974375859256892 |
| HLA-DRB6 | 9.60075385573885  | 14.7626888278709 | -0.620735916596503 | 3.98985314547926e-05 | 0.00109419450968806  |
| SAA1     | 0.701516095007068 | 1.63407231273612 | -1.21992371925487  | 4.26211305047103e-05 | 0.00115857633845219  |
| MT1A     | 1.35904916882704  | 2.19947414327132 | -0.694560989127169 | 4.86161103598624e-05 | 0.0012963265547784   |
| SELE     | 1.24801098590844  | 2.03778619567832 | -0.707372058109629 | 5.95988514069837e-05 | 0.00150995760694551  |
| TNFRSF17 | 0.567958735582707 | 1.2839768904674  | -1.17676121525958  | 6.55777001904281e-05 | 0.00163914931087013  |
| PAX9     | 0.757598829364847 | 1.23885510871562 | -0.709501459118303 | 7.89149442546377e-05 | 0.00190883699483943  |
| PODN     | 0.907672040860992 | 1.42964207170309 | -0.655410972270763 | 8.45814911433768e-05 | 0.00202657252779531  |
| TPSAB1   | 0.832581658435283 | 1.38173698662322 | -0.730819343396853 | 8.60622166645248e-05 | 0.00205325106386545  |
| CAPN6    | 0.704409622727986 | 1.329555322308   | -0.916457285815213 | 0.000114488636394403 | 0.00256368946542981  |
| TFF3     | 33.1619623263594  | 63.2730790868421 | -0.932062424677554 | 0.000177127000318595 | 0.00370420704406916  |
| KLHDC7B  | 0.869162582961458 | 1.37674710275073 | -0.663565598832029 | 0.000198342492690586 | 0.00404695898711255  |
| ADRA2A   | 1.25319207863922  | 1.91562545747942 | -0.612207957688723 | 0.000212447837691884 | 0.0042469310295212   |
| HLA-DOA  | 7.20669549699787  | 10.8893946862148 | -0.595513966678015 | 0.000355980799779096 | 0.00634485650785866  |
| C7       | 4.25034854684148  | 7.33717214298336 | -0.787642980430915 | 0.000371361587993705 | 0.00655629110929517  |
| SMR3B    | 0.681247932660651 | 2.14740409828042 | -1.65634185110491  | 0.000418093417441062 | 0.00717000286024693  |
| ANKRD22  | 0.709385848124797 | 1.08786965292375 | -0.616863250502989 | 0.000448735989223624 | 0.00757162978999861  |
| TPSB2    | 1.59465960701675  | 2.5607947811158  | -0.683343139860437 | 0.000455731284162669 | 0.00765884278354337  |
| CD27     | 9.05501766276338  | 13.7185465666021 | -0.599338280550157 | 0.000470465367756529 | 0.00784358364613569  |
| VGf      | 0.894277608580427 | 1.90495476194867 | -1.09096207900511  | 0.000551944951738802 | 0.00894417461890162  |
| CXCL13   | 3.91915504890135  | 8.13895902055763 | -1.05430163471928  | 0.000986617628929939 | 0.0139877870753393   |
| SLC6A14  | 0.638354980472872 | 1.14746005351541 | -0.846013114796454 | 0.00107717604803628  | 0.0150053128552031   |
| LTF      | 1.95674577202423  | 2.98811130583212 | -0.610777561261136 | 0.00118885841973676  | 0.0161012583547126   |
| AREG     | 1.54115404555294  | 2.3223703529411  | -0.591586986774131 | 0.00121223475724861  | 0.0162925305944519   |
| S100B    | 2.51720108446041  | 4.04608586653621 | -0.684706467709691 | 0.00160200747290469  | 0.0203397951064023   |
| NAPSA    | 2.38000762665874  | 3.75157662021192 | -0.656530826768576 | 0.00186514726591514  | 0.0228171042625301   |
| MMP7     | 6.27668419909388  | 10.8512708959508 | -0.789789491294721 | 0.0019236573928072   | 0.0232614144139599   |
| CST1     | 1.64957194811478  | 4.11095839819027 | -1.31738306808566  | 0.00196946751855502  | 0.023644888490483    |
| SFTPb    | 111.555996942224  | 180.615773736556 | -0.695155822393449 | 0.00433370665976403  | 0.0418644356297517   |
| BIRC7    | 2.58585859403016  | 4.13984110389744 | -0.678932010535374 | 0.0044482500676253   | 0.0425747112445546   |
| STMN2    | 0.891606850565602 | 1.40164422904739 | -0.65264059863507  | 0.00973519461769488  | 0.0737816015038312   |
| CR2      | 0.954286584449515 | 1.55653878613622 | -0.705847030450496 | 0.0170208538021105   | 0.10822119842091     |
| C1QL2    | 1.01526100542538  | 1.54210200799998 | -0.603047534614884 | 0.03990370459756     | 0.187154623464842    |

Up-regulated genes

| gene name | DNA <sub>m</sub> age drift | REST               | log2FC           | Pvalue               | Qvalue               |
|-----------|----------------------------|--------------------|------------------|----------------------|----------------------|
| DHRS2     | 1.03230444031457           | 0.0549255665861028 | 4.23224684636633 | 1.33402851885783e-70 | 1.37229724633214e-66 |

|          |                  |                     |                   |                      |                      |
|----------|------------------|---------------------|-------------------|----------------------|----------------------|
| AKR1C2   | 3.69671996538597 | 0.224878401092519   | 4.03902875408615  | 1.63641455560713e-70 | 1.37229724633214e-66 |
| GPX2     | 1.00109973388594 | 0.0240006494475943  | 5.38236845353921  | 2.29466496948289e-67 | 9.62153021704175e-64 |
| AKR1B10  | 6.93972041826051 | 0.0711876253980997  | 6.60710725348711  | 1.08073755626169e-51 | 3.62522605872422e-48 |
| AKR1C1   | 3.72651768419518 | 0.523494811251087   | 2.83158096327788  | 2.06680752792303e-48 | 5.7774159763875e-45  |
| AKR1C3   | 5.45676143248165 | 1.28747504411027    | 2.08350050305887  | 3.09494126008042e-41 | 7.41547925915269e-38 |
| NPY      | 12.3346352329709 | 0.40145940086397    | 4.94131714482576  | 3.64016681828153e-31 | 5.08773982301815e-28 |
| THADA    | 5.7806729646805  | 2.69425334016315    | 1.10135194221521  | 2.63921813205028e-29 | 3.16178332219624e-26 |
| PDX1     | 1.16944093540137 | 0.00184713560143423 | 9.30631350147363  | 4.39990324589835e-24 | 3.883956696853e-21   |
| HHIPL2   | 1.52127748416874 | 0.332710128545257   | 2.19294563631285  | 4.81043935546889e-17 | 2.44486935969468e-14 |
| MYH2     | 1.49699712326867 | 0.0208184163643471  | 6.16806731031885  | 9.05826310124674e-15 | 3.1651080986273e-12  |
| UCHL1    | 2.87732071835422 | 1.511970393613      | 0.928296148987991 | 1.08801893415757e-11 | 2.68356670054277e-09 |
| CYP4F11  | 2.28919762557597 | 0.86061783382527    | 1.41139737418688  | 1.51173679107973e-11 | 3.57110555774496e-09 |
| OSGIN1   | 2.12433228444261 | 1.24570605511949    | 0.770045766856189 | 1.99619359333152e-11 | 4.6500220760217e-09  |
| KLK4     | 2.86064868817435 | 0.986613519793343   | 1.53578537123616  | 5.4553962483669e-09  | 7.03830045212382e-07 |
| SLC38A3  | 1.47268813258257 | 0.762109860028538   | 0.950381060967215 | 1.95463221188733e-08 | 2.07487920618824e-06 |
| AKR7A3   | 1.31092521434989 | 0.69919314345096    | 0.90682244263892  | 3.75323700831636e-08 | 3.79212597008928e-06 |
| CKMT2    | 2.98130384583408 | 1.60574999570935    | 0.892696125523506 | 9.8675320482967e-08  | 8.61970039135585e-06 |
| NPTX2    | 1.31106418035208 | 0.740934106813716   | 0.823321160601065 | 4.54233672639043e-07 | 2.99937289665434e-05 |
| PPY      | 6.49041164406634 | 0.620940421757264   | 3.38578322585993  | 5.06784530193292e-07 | 3.19540982721875e-05 |
| NQO1     | 45.0012058397775 | 27.6986846152936    | 0.700146194355874 | 9.29000974445781e-07 | 5.17647984830719e-05 |
| SLC30A3  | 1.253708923211   | 0.590009820882675   | 1.08739155898129  | 1.60305504582895e-06 | 8.19708513068391e-05 |
| HPDL     | 1.91526232690405 | 1.15748504008854    | 0.72654845917062  | 2.46889859453597e-06 | 0.00011502324229877  |
| DGAT2    | 5.44420229617573 | 3.61578638149577    | 0.590411228926867 | 2.78049214774998e-06 | 0.000127069248779462 |
| C1QL4    | 3.50093821888384 | 2.21607510309682    | 0.659734827373791 | 3.78296483378054e-06 | 0.000163105105892461 |
| SLC14A2  | 1.53015499718879 | 0.610463225576548   | 1.32570150353155  | 4.04850394605135e-06 | 0.000172777374511891 |
| ECEL1    | 1.31733250590117 | 0.69828751319131    | 0.915726460299963 | 6.85541907547184e-06 | 0.000260723557219532 |
| BEX1     | 20.5391653477424 | 12.474923691137     | 0.719346565242387 | 7.24074429079956e-06 | 0.000272290948980472 |
| TRIM54   | 1.44627153418836 | 0.911490236869917   | 0.666039331926126 | 8.22768959961693e-06 | 0.000302620197291174 |
| CNTFR    | 3.50429595875934 | 1.46732930054887    | 1.25593194487852  | 1.06710971587864e-05 | 0.000376790824309823 |
| ACTA1    | 2.65472820060966 | 1.10791724197967    | 1.2607140404356   | 3.38307847885278e-05 | 0.000968276318213631 |
| MYL1     | 1.25743202946284 | 0.190113952277476   | 2.7255440982361   | 9.17084536244563e-05 | 0.0021568463326072   |
| RPPH1    | 17.3344696669474 | 8.5807067011593     | 1.01447532210187  | 0.000406197865513757 | 0.00701622100967737  |
| MSI1     | 1.15918041359427 | 0.72116945051317    | 0.684694934208853 | 0.000414889241295003 | 0.00712963356045061  |
| EEF1A2   | 1.22223546025307 | 0.714477441258139   | 0.774561877267327 | 0.00087269483789717  | 0.0127055883864682   |
| GATA5    | 2.30956307857966 | 1.13241849151686    | 1.02821273684137  | 0.00089007616049858  | 0.0128803773631425   |
| PLA2G2A  | 3.16846339839765 | 1.76772426748929    | 0.841890091480981 | 0.00177613563247849  | 0.0219200491743408   |
| FLRT1    | 2.20858968773394 | 1.37355541259414    | 0.685210305948542 | 0.00249996527920254  | 0.0284653208844433   |
| GLDN     | 1.77827469209589 | 1.10553008301295    | 0.685739912681504 | 0.00259456393042313  | 0.0291405964482914   |
| SH3GL2   | 1.41007433490911 | 0.85916932152431    | 0.714756834356333 | 0.00290525642880367  | 0.0318268849274299   |
| PENK     | 1.78197816955538 | 0.960026684716777   | 0.892333250595388 | 0.00353151523035797  | 0.0363154956735524   |
| SCARNA10 | 1.49308024806746 | 0.825768958676364   | 0.854481615015921 | 0.00403123142247871  | 0.0400069901880549   |
| SST      | 2.04927724112729 | 0.879859943097662   | 1.2197693781934   | 0.013067524513919    | 0.0906779152451176   |
| LCN6     | 6.74198940733992 | 4.28090959239454    | 0.655256992745688 | 0.0138280399475891   | 0.0942396936208717   |
| KLK1     | 3.73551429011891 | 2.08764467253269    | 0.839430702001721 | 0.0203396422757953   | 0.121573941642779    |
| MYOC     | 1.18749333182813 | 0.784141279484035   | 0.598733897634714 | 0.0257659557617314   | 0.140984881012521    |
